# Supplementary material for: Adsorption of nucleotides and nucleic acids on goethite nanoparticles: mode, sites and relationship with phosphate and non-phosphate structures
Source: Royal Society of Chemistry journal article supplement (doi:10.1039/d3en00891f), 2024-01-01
Supplement: d3en00891f1.pdf [file d3en00891f1.pdf]

## Supplementary Information

### Adsorption of nucleotides and nucleic acids on goethite nanoparticle: mode, sites and relationship with phosphate and non-phosphate structure

There are 9 texts, 3 tables, and 20 figures.

#### Table of contents

| Item     | Content                                                                                                         | Page |
|----------|-----------------------------------------------------------------------------------------------------------------|------|
| Text-S1  | Sources of chemical P-OH $pK_a$ values.                                                                         | 1    |
| Text-S2  | Preparation of goethite.                                                                                        | 1    |
| Text-S3  | Adsorption kinetics experiment.                                                                                 | 2    |
| Text-S4  | pH change experiment and the influence of coexisting ions                                                       | 2    |
| Text-S5  | $\text{OH}^-$ release and its quantification                                                                    | 2    |
| Text-S6  | Method for quantification of phosphorus in solution                                                             | 3    |
| Text-S7  | Experiment for examining the potential influence from tube adsorption, filtration and degradation in adsorption | 4    |
| Text-S8  | Quantification of $S_{\text{P-OH-OH}^-}$                                                                        | 5    |
| Text-S9  | The logic behind using $S_{\text{P-OH-OH}^-}$ to compare the $pK_a$ values of adsorption sites of NNAs and PA   | 8    |
| Table S1 | Molecular weight, sources, purity, and Nanodrop detecting wavelength of chemicals                               | 10   |
| Table S2 | Content and volume of goethite suspension and the chemical solution used in the adsorption experiment.          | 11   |
| Table S3 | Relation of P-O(H) engaged in Fe-O-P bonding with molecular structure and phosphorus adsorption capacity        | 13   |
| Fig. S1  | Acid-base titration data and pH-dependent proton consumption of chemicals.                                      | 14   |
| Fig. S2  | Gel electrophoresis and sizes of nucleic acids.                                                                 | 15   |

|          |                                                                                                                                                                                                               |    |
|----------|---------------------------------------------------------------------------------------------------------------------------------------------------------------------------------------------------------------|----|
| Fig. S3  | Characterization of goethite: SEM and XRD.                                                                                                                                                                    | 16 |
| Fig. S4  | Adsorption kinetics of organic chemicals on goethite.                                                                                                                                                         | 17 |
| Fig. S5  | Principle and examination of HCl titration in measuring apparent OH <sup>-</sup> release in adsorption.                                                                                                       | 18 |
| Fig. S6  | Change of concentration for NNAs in solution after polypropylene tube adsorption and 0.22 μm filter-filtration                                                                                                | 19 |
| Fig. S7  | Extracted percent of adsorbed NNAs on goethite                                                                                                                                                                | 19 |
| Fig. S8  | Size of RNA and DNA3 extracted from goethite                                                                                                                                                                  | 20 |
| Fig. S9  | Adsorption isotherm of PA and NNAs on goethite at pH7.0                                                                                                                                                       | 21 |
| Fig. S10 | Solution pH, amount of phosphorus adsorbed and amount of HCl added in the ligand exchange of PA on goethite at pH7.0.                                                                                         | 22 |
| Fig. S11 | The linear relationship between the amount of OH <sup>-</sup> released from goethite and the amount of PA P-O(H) engaged in ligand exchange for PA.                                                           | 23 |
| Fig. S12 | Solution pH and amount of nucleotide (nucleic acid) phosphorus adsorbed in the ligand exchange experiment when only nucleotide (nucleic acid) existed.                                                        | 24 |
| Fig. S13 | Solution pH and amount of nucleotide (nucleic acid) adsorbed in the ligand exchange experiment when only nucleotide (nucleic acid) existed.                                                                   | 25 |
| Fig. S14 | Solution pH and amount of HCl added in the ligand exchange experiments when only nucleotide (or nucleic acid) existed.                                                                                        | 26 |
| Fig. S15 | The linear relationship between the amount of nucleotide (or nucleic acid) adsorbed and the amount of OH <sup>-</sup> released in the ligand exchange experiment when only nucleotide (nucleic acid) existed. | 27 |
| Fig. S16 | Solution pH and amount of 2mM HCl were added in the ligand exchange experiment when PA and nucleotide (or nucleic acid) coexisted.                                                                            | 28 |
| Fig. S17 | Solution pH and amount of nucleotide (or nucleic acid) adsorbed in the ligand exchange experiment when PA and nucleotide (or nucleic acid) coexisted.                                                         | 29 |
| Fig. S18 | Solution pH and amount of PA phosphorus adsorbed in the ligand exchange experiment when PA and nucleotide (or nucleic acid) coexisted.                                                                        | 30 |
| Fig. S19 | Comparison of $S_{P-OH-OH^-}$ derived with assumed engagement of P-O(H) groups in CMP, CDP, CTP, GMP, dTMP and dUMP in ligand exchange with that of PA.                                                       | 31 |
| Fig. S20 | Adsorption of nucleoside on goethite at pH7.0.                                                                                                                                                                | 32 |

**Text-S1. Sources of chemical P-OH  $pK_a$  values.** The  $pK_a$  values of P-OH groups for phosphoric acid (PA) are from reference 1. The  $pK_a$  values of P-OH for AMP, CMP, GMP, and dTMP are from reference 2. For dUMP, ATP, ADP, CTP and CDP,  $pK_a$  values of P-OH groups  $>4$  were determined by acid-base titration (see Fig. S1), while  $pK_a$  values  $<4$  were estimated by Marvin Sketch software due to the low accuracy of acid-base titration when pH is low ( $pH < 3$ ). The acid-base titration was conducted in 5.00 mM KCl by a modified batch method.<sup>3</sup> A solution containing 1.00 g/L compound with pH 12.00 (adjusted by NaOH) was prepared. Then, 5.00 mL compound solutions were mixed with different amounts of 20 mM HCl (0-5.00 mL) and 5.00 mM KCl solution to a final volume of 10.0 mL. After that, the sample vials were shaken and mixed for 1 hour at 150 r/min at  $25 \pm 1$  °C in dark, and the pH of the solution was measured at  $25 \pm 1$  °C. The 5.00 mM KCl solution without the addition of the compound was conducted as a control. The difference of HCl consumed for a final pH was derived to obtain the amount of  $H^+$  consumed by phosphate compounds ( $Q_H$ ,  $\mu\text{mol}$ ). The  $pK_a$  value of the compound was derived by regression analysis of the measured final pH and  $Q_H$  using the proton consumption formula for chemicals (or solids) containing Brønsted acid/base groups<sup>2</sup> as follows:

$$Q_H = \sum_{i=1}^n \left\{ C_{T,i} \times \left[ \frac{1}{1 + 10^{(pH - pK_{a,i})}} - \frac{1}{1 + 10^{(pH_0 - pK_{a,i})}} \right] \right\}$$

where  $n$  was the number of acidic functional groups in the compounds,  $C_{T,i}$  was the amount of acidic functional groups ( $\mu\text{mol}$ ),  $pK_{a,i}$  was the  $pK_a$  value of acidic group  $i$ , and pH was the pH value of the solution at acid-base equilibrium, and  $pH_0$  was the pH value when no  $H^+$  was consumed by phosphate compound.  $n$  was dependent on the structure of the phosphate compound, the possible  $pK_a$  value, and the pH range of acid-base titration.  $C_{T,i}$ , pH and  $Q_H$  were obtained from experiments ( $Q_H$  was obtained when the amount of HCl consumed in nucleotide solution subtracted from that consumed in 5.00 mM KCl solution at the same final pH),  $pK_{a,i}$  and  $pH_0$  were constants estimated by regression analysis. Fig. S1a depicted the determined titration curve of phosphate compound solutions and 5.00 mM KCl solution. The calculated  $Q_H \sim \text{pH}$  and regression analysis derived results were shown in Fig. S1b.

**Text-S2. Preparation of goethite.** Goethite was synthesized by a method modified from Cornell and Schwertmann<sup>4</sup>. 90 mL 5 M NaOH (4°C) was mixed with 50 mL 1M  $\text{FeCl}_3 \cdot 6\text{H}_2\text{O}$  solution (4°C) by magnetic stirring, and then diluted to 1 L using deionized water. The magnetic stirring lasted for 10 min, and the derived solution was aged at 70 °C for 60 h. Thereafter, 850 mL supernatant was discarded, and the residual suspension was placed in a dialysis bag of 8000-14000 and dialyzed in deionized water. The deionized water was replaced every 12 hours until the conductivity of external water was  $\leq 10$   $\mu\text{S/cm}$ .

**Text-S3. Adsorption kinetics experiments.** The batch adsorption method was employed. Compound solution (1.00 mL,  $100\pm 5$  mg/L, pH 7.00) was mixed with goethite suspension (pH 7.00), shaken horizontally at 150 r/min in dark at 25 °C for 5, 10, 20, 30, 60, 120, 180, 240 and 300 min. At each time, the suspension was filtered through a 0.22  $\mu$ m filter, and the phosphorus (or phosphate compound) concentration was measured. Vials containing only compound solutions were also conducted as control groups. No significant change in compound concentration with shaking time was observed in the control groups, suggesting a negligible degradation of compounds.

**Text-S4. pH change experiment and the influence of coexisting ions.** OH<sup>-</sup> release-caused pH change, influence of coexisting ions as a competing solute in NNA adsorption, and effect of PA pre-adsorption on NNA adsorption, were measured to discriminate the adsorption mode and sites of NNAs on goethite. For the pH change experiment, a goethite suspension and a chemical solution with an initial pH of 7.00-7.05 were mixed, and shaken horizontally at 150 r/min in dark at  $25\pm 1$  °C. The pH of the solution and phosphate concentration were determined after adsorptive interactions. To assess the influence of coexisting ions on adsorption, 2 mmol/L KCl or 2 mmol/L Na<sub>2</sub>SO<sub>4</sub>, corresponding to 2-fold of the mole concentration of P-O(H) in the selected chemicals, was added. The solution pH after adsorption was controlled to pH 7.00-7.05 by adding diluted HCl solution. The percentage of NNA adsorbed was derived to examine whether the coexisting Cl<sup>-</sup> and SO<sub>4</sub><sup>2-</sup> could compete against phosphate via electrostatic interactions on goethite. The detailed amounts of goethite suspensions and chemicals added in the pH change and the influence of coexisting ions experiments were listed in Fig. S2. To assess the effect of PA pre-adsorption on organic phosphate adsorption, 100 mmol/L PA (1000  $\mu$ L) was directly added into goethite suspensions (600  $\mu$ L), shaken horizontally in dark at 150 r/min at  $25\pm 1$  °C for 120 min (final pH was about pH 7.00-7.05), and then organic phosphate (1000  $\mu$ L, 1.00 mmol-P/L, pH 7.00) was added, shaken horizontally at 150 r/min in dark at  $25\pm 1$  °C for 120 min. The final pH was controlled to pH 7.00-7.05 by adding HCl immediately after addition of organic phosphate solution to consume the released OH<sup>-</sup>.

**Text-S5. OH<sup>-</sup> release and its quantification.** Quantification of the amount of OH<sup>-</sup> released during adsorption (referred to as  $Q_1$  in Fig. S5a) was necessary for analyzing the stoichiometric relationship between Fe-O-P bonding and OH<sup>-</sup> release. An experiment was conducted, which involved buffering OH<sup>-</sup> release by HCl titration (Fig. S5). As depicted in Fig. S5a, the OH<sup>-</sup> released from goethite ( $Q_1$ ) was partly consumed by H<sup>+</sup> from the P-OH group of nucleotides (or nucleic acids) ( $Q_2$ ) involved in the formation of Fe-O-P bonds. The remaining released OH<sup>-</sup> (referred to as apparent amount of OH<sup>-</sup>

released,  $Q_a$ ) caused an increase in system pH. Due to the pH buffering effects of goethite, nucleotides (or nucleic acids), and carbonate in the system, a portion of the apparent  $\text{OH}^-$  release was consumed by these buffering substances ( $\text{BiH} + \text{OH}^- \rightarrow \text{Bi}^- + \text{H}_2\text{O}$ , where BiH represents the acid group of the buffering substances). However, it was difficult to accurately quantify the amount of  $\text{OH}^-$  consumed by BiH due to the lack of precise information regarding the amount and  $\text{p}K_a$  of the buffering substances involved in pH buffering. Consequently, HCl titration was employed to neutralize the  $\text{OH}^-$  consumed by BiH (i.e.  $\text{Bi}^- + \text{H}^+ \rightarrow \text{BiH}$ ) in order to determine  $Q_a$  (Fig. S5b). In summary, different volumes of 1.86 mmol/L (or 1.82 mmol/L) HCl (given that the HCl concentration was insufficient to dissolve goethite) were mixed with a suspension of goethite (initial pH 7.00-7.02) and a chemical solution (initial pH 7.00-7.02), resulting in dynamic equilibrium pH values ranging from above pH 7.0 to below pH 7.0. The amount of  $Q_a$  was calculated based on the volume of HCl consumed at the equilibrium pH (7.00) (please refer to Table S2, Fig. S10, S14 and S16 for more details). It is worth noting that, to verify the accuracy of the  $Q_a$  determination method, HCl titration was performed in a system containing goethite, nucleotides (or nucleic acid), and carbonate (Fig. S5b). The results showed that the deviation between the  $\text{OH}^-$  measured by HCl titration and the added  $\text{OH}^-$  from NaOH was  $<5\%$ , confirming the accuracy of HCl titration in measuring  $Q_a$ . The amount of  $\text{OH}^-$  consumed by  $\text{H}^+$  from the P-OH group of nucleotides (or nucleic acids) ( $Q_2$ ) was calculated based on the pH,  $\text{p}K_a$  and adsorption amount of P-O(H). The procedure for determining  $Q_2$  is described in detail in Text-S7 (please refer to the following section).

**Text-S6. Method for quantifying phosphorus concentration in nucleic acid solution and PA solution.** Since the examined nucleic acids are a mixture of different sizes and their molecular weight are not definite, the phosphorus concentration in the nucleic acid solution cannot be directly calculated based on the molecular weight and the measured mass concentration of nucleic acids. Thus, we opted to measure the phosphorus concentration directly using an ammonium molybdate spectrophotometric method. This method is in accordance with the National standards of the People's Republic of China (GB/T 11893-1989) and is commonly used for quantifying the total phosphorus content in water. The procedure for measuring the phosphorus concentration involves two steps:

1) Potassium persulfate digestion treatment of the nucleic acid solution: In a 10 mL glass scale tube, 5.00 mL of the nucleic acid solution (with a phosphorus concentration below 2 mg/L) and 800  $\mu\text{L}$  of potassium persulfate (50 g/L) were added. The tube is tightly sealed with a small piece of cloth and wire, placed in a large beaker, and heated in an autoclave at 120 °C for 30 minutes. Afterwards, the solution is diluted to 10 mL with deionized water.

2) Spectrophotometric determination: To the digested solution, 200  $\mu\text{L}$  ascorbic acid solution

(100 g/L) is added and mixed for 30 seconds. Then, 400  $\mu$ L of molybdate solution (prepared by adding 300 mL (1+1) $H_2SO_4$  to a mixture of 100 mL of 130 g/L ammonium molybdate and 100 mL of 3.5 g/L potassium antimony tartrate) is added and mixed at room temperature for 15 minutes. The absorbance of the solution at 700 nm is measured using water as a reference. The phosphorus concentration is calculated using the obtained absorbance and a standard curve measured using Potassium phosphate monobasic ( $KH_2PO_4$ ).

To assess the efficiency of this two-step method, we measured the phosphorus concentration in the solution containing CMP (with a mass concentration of 370 mg/L) and CDP (with a mass concentration of 45 mg/L). Subsequently, we calculated the ratio of the measured phosphate concentration to the phosphate concentration derived from the mass concentration and molecular formula. The obtained ratios were  $1.06\pm 0.10$  for CMP and  $1.04\pm 0.01$  for CDP, indicating the effectiveness of this two-step method in accurately measuring the phosphorus content in organic chemical having phosphate ester structures.

The procedure for analyzing the phosphorus concentration in the PA solution is the same as that for nucleic acid solution, with the exception that the potassium persulfate digestion step, which converts nucleic acid phosphate esters into phosphoric acid and its anions, is omitted.

### **Text-S7. Experiment for examining the potential influence of tube adsorption, filtration and degradation in adsorption.**

**i) Experiment for evaluating the influence of tube adsorption and filtration.** A solution of nucleotides, nucleic acids and nucleosides was prepared in 5.00 mM KCl with a pH of 7.0. The concentration of nucleotides and nucleic acids in the solutions was equivalent to 1.00 mmol/L phosphorus, while the concentration of nucleosides was equivalent to 0.500 mmol/L. These concentrations fall within the range of solute concentrations used in the batch adsorption experiment (Table S2). Solutions of 2.00 mL were added to 10 mL polypropylene tubes, shaken at 150 r/min at 25  $^{\circ}C$  in dark for 2 hours, sampled, and filtered through a 0.22  $\mu$ m filter. The concentrations of nucleosides, nucleotides, and nucleic acids in the solutions before and after tube adsorption, shaking, and filtration were measured by an ultraviolet-visible spectrophotometer with the wavelengths specified in Table S1. The change in concentrations of nucleotides, nucleic acids and nucleosides ( $\varphi$ ) was calculated using the following equation:

$$\varphi = \frac{C_{after}}{C_{before}} \times 100\%$$

where  $C_{after}$  and  $C_{before}$  are the concentrations of nucleotides, nucleic acids and nucleosides before tube adsorption and filtration, and after tube adsorption and filtration, respectively. The results are presented in Fig. S6.

**ii) Experiment for evaluating the contribution of adsorption and degradation of nucleotides and nucleic acids caused by goethite.** The decrease in the amount of nucleotides, RNA and DNA3 in solution caused by interactions with goethite, as well as the amount of NNAs extracted from goethite, were analyzed to examine the contribution of adsorption and degradation. In a 10.0 mL polypropylene tube, 1000  $\mu\text{L}$  goethite suspensions (16.65 mg/mL goethite solid content, 5 mmol/L KCl, pH 7.0) was mixed with 1000  $\mu\text{L}$  solutions of nucleotides, RNA and DNA3 (1.00 mmol-P-O(H)/L, 5 mmol/L KCl, pH 7.0). The tubes were shaken at 150 r/min at 25 °C in the dark for 2 hours and then centrifuged at 5000g for 5 minutes. A volume of 1500  $\mu\text{L}$  supernatant was sampled, and the concentration of NNAs ( $C_e$ ) were detected by an ultramicro spectrophotometer (Nanodrop 2000, Thermo Fisher). Considering that tube adsorption was found to be negligible based on the results in Fig. S6, the decrease in NNA concentration ( $C_d$ ) in solution was attributed to the dilution of the NNA solution by goethite suspension and interactions with goethite. The equation used is as follows:

$$C_d = \frac{1.00 \text{ mmol} - P - O(H)/L \times 1000 \mu\text{L}}{1000 \mu\text{L} + 1000 \mu\text{L}} - C_e$$

When 1500  $\mu\text{L}$  of the supernatant was sampled, 1500  $\mu\text{L}$  of a solution composed of 100 mmol/L PA (inorganic phosphate) and 100 mmol/L NaCl with a pH of 7.0 was immediately added to extract the NNAs from goethite. This specific solution was chosen for extraction considering the different roles played by PA and NaCl (as described in reference 32 in the main text). After adding the extraction solution, the tubes were covered, shaken at 150 r/min at 25 °C in the dark for 24 hours, and then centrifuged at 5000g for 5 minutes. The concentration of NNAs in the supernatant of the extraction solution was measured ( $C_{\text{extraction}}$ ). The ratio ( $R$ ) of the amount of extracted NNAs to the amount of NNAs decreased after interactions with goethite was calculated using the following equation:

$$R = \frac{2000 \mu\text{L} \times C_{\text{extraction}} - 500 \mu\text{L} \times C_e}{2000 \mu\text{L} \times C_d}$$

### **Text-S8. Quantification of $S_{\text{P-OH-OH}^-}$ .**

**i)  $S_{\text{P-OH-OH}^-}$  for single-solute adsorption of PA, nucleotide or nucleic acid.**  $S_{\text{P-OH-OH}^-}$  is the relation between the amount of P-O(H) engaged in ligand exchange (i.e., forming Fe-O-P) and the amount of OH<sup>-</sup> exchanged from goethite ( $Q_1$ ). PA mainly forms bidentate on goethite at pH7 (two P-OH of PA form Fe-O-P linkages).<sup>5</sup> Therefore, the mole amount of P-O(H) engaged in the complexation of PA [ $m(P - O(H)_{\text{PA complexation}})$ ] was twice that of PA adsorption capacity [ $m((\text{PA})_{\text{adsorbed}})$ ] (Fig. S10a):

$$m(P - O(H)_{\text{PA complexation}}) = 2m((\text{PA})_{\text{adsorbed}}) \quad (1)$$

OH<sup>-</sup> exchanged by PA from goethite [ $m(\text{OH}^-_{\text{PA-motivated release from goethite}})$ ], i.e., the  $Q_1$  in Fig. 3a and Fig. S5a] was composed of apparent OH<sup>-</sup> release after adsorption [i.e.,  $Q_a$ , which was

$m(H^+_{added\ for\ PA})$  determined by HCl titration as shown in Fig. S10b] and  $OH^-$  consumed by P-OH engaged in Fe-O-P bonding [ $m(OH^-_{consumed\ by\ P-OH\ of\ PA})$ , i.e., the  $Q_2$  in Fig. 3a and Fig. S5a]:

$$m(OH^-_{PA-motivated\ release\ from\ goethite}) = m(H^+_{added\ for\ PA}) + m(OH^-_{consumed\ by\ P-OH\ of\ PA}) \quad (2)$$

The  $OH^-$  consumed by P-OH engaged in Fe-O-P bonding can be calculated from the mole adsorption amount of PA, the pH value and the  $pK_a$  value of P-OH. For PA, the  $pK_a$  values for the bidentate at pH7.0 should be 2.21 (denoted as  $pK_a(i)$ ) and 7.21 (denoted as  $pK_a(ii)$ ) rather than 12.6 (denoted as  $pK_a(iii)$ ) because P-OH of  $pK_a(iii)$  would be more unfavorable than P-O(H) of  $pK_a(i)$  and  $pK_a(ii)$  in losing  $H^+$  to form Fe-O-P in thermodynamics. Thus,  $OH^-$  consumed by P-OH engaged in Fe-O-P bonding was:

$$m(OH^-_{consumed\ by\ P-OH\ of\ PA}) = m(P-OH(i)_{adsorbed}) + m(P-OH(ii)_{adsorbed}) \quad (3)$$

where,  $m(P-OH(i)_{adsorbed})$  and  $m(P-OH(ii)_{adsorbed})$  are the mole of protonated form of P-O(H) (i.e., P-OH) engaged in Fe-O-P bonding:

$$m(P-OH(i)_{adsorbed}) = m((PA)_{adsorbed}) \times \frac{K_a(i)}{K_a(i) + 10^{-pH}} \quad (4)$$

$$m(P-OH(ii)_{adsorbed}) = m((PA)_{adsorbed}) \times \frac{K_a(ii)}{K_a(ii) + 10^{-pH}} \quad (5)$$

Fig. S10 summarized the results of  $m((PA)_{adsorbed})$  and  $m(H^+_{added\ for\ PA})$ . Fig. S10 depicted the  $S_{p-OH-OH^-}$  of PA [plotted as  $m(OH^-_{consumed\ by\ P-OH\ of\ PA})$  versus  $m(P-O(H)_{PA\ complexation})$ ] derived from three replicate experiments. The slope 0.727-0.850 (consideration the standard deviation in linear regression analysis) suggested that iron hydroxyls engaged in LE were composed of 72.7-85.0% Fe-OH (which released  $OH^-$  in Fe-O-P bonding, see Fig. 3a) and 15.0-22.3% Fe-OH<sub>2</sub><sup>+</sup> (which released H<sub>2</sub>O in Fe-O-P bonding, see Fig. 3a).

The method for calculating  $S_{p-OH-OH^-}$  for nucleotide or nucleic acid was the same as PA, except that the  $pK_a$  value and/or number of P-O(H) groups engaged in Fe-O-P bonding were different. Fig. S12-S14 depicted the amount adsorbed for phosphorus of nucleotide (or nucleic acid) and  $OH^-$  released to solution after adsorption, which were equivalent to  $m((PA)_{adsorbed})$  and  $m(H^+_{added\ for\ PA})$  of PA in respective, in calculation of  $S_{p-OH-OH^-}$ . Fig. S15 depicted the relation of apparent  $OH^-$  release with an adsorbed mass of nucleotide (or nucleic acid).



ii)  $S_{P-OH-OH^-}$  for PA in bi-solute adsorption (coexistence of PA and nucleotide, or coexistence of PA and nucleic acid). In calculation of  $S_{P-OH-OH^-}$  of PA in bi-solute adsorption, apparent  $OH^-$  release from adsorption of NNA was excluded based on the amount of apparent  $OH^-$  release in adsorption (estimated by volume of HCl added at pH7.00, Fig. S16), amount of PA adsorbed (Fig. S17), amount of nucleotide (or nucleic acid) adsorbed (Fig. S18), and the relationship between nucleotide (or nucleic acid) adsorbed and apparent  $OH^-$  release (Fig. S15). When NNA coexisted, the final release amount of  $OH^-$  (determined by acid titration, Fig. S16) was contributed by both nucleotide (or nucleic acid) adsorption (Fig. S18) and PA adsorption (Fig. S17). The mole amount of P-O(H) involved in the complexation of PA [ $m'(P-O(H))_{PA\text{ complexation}}$ ] was twice that of PA adsorption capacity [ $m'((PA)_{adsorbed})$ ]:

$$m'(P-O(H))_{PA\text{ complexation}} = 2m'((PA)_{adsorbed}) \quad (6)$$

The amount of apparent  $OH^-$  release from nucleotide (or nucleic acid) adsorption [ $m'(OH^-)_{organic\ P\ adsorption}$ ] could be calculated by the amount of nucleotide (or nucleic acid) adsorbed in the bi-solute adsorption [ $m(organic\ P\ adsorbed)$ ], and the relationship between  $OH^-$  release and nucleotide (or nucleic acid) adsorption [ $f(m(organic\ P\ adsorbed))$ ] derived in single-solute adsorption of nucleotide (or nucleic acid) (Fig. S15):

$$m'(OH^-)_{organic\ P\ adsorption} = f(m(organic\ P\ adsorbed)) \quad (7)$$

The amount of apparent  $OH^-$  release from PA adsorption in bi-solute adsorption was calculated by subtracting the apparent  $OH^-$  release from nucleotide (or nucleic acid) adsorption from the amount of  $OH^-$  release determined by HCl titration in the bi-solute adsorption [ $m'(H^+_{added})$ ]:

$$m'(OH^-)_{PA\ adsorption} = m'(H^+_{added}) - m'(OH^-)_{organic\ P\ adsorption} \quad (8)$$

$OH^-$  exchanged by PA from goethite [ $m'(OH^-)_{PA-motivated\ release\ from\ goethite}$ ] was composed of  $OH^-$  released to solution after adsorption [ $m'(OH^-)_{PA\ adsorption}$ ] and  $OH^-$  consumed by P-OH engaged in Fe-O-P bonding [ $m'(OH^-)_{consumed\ by\ P-OH\ of\ PA}$ ]:

$$m'(OH^-)_{PA-motivated\ release\ from\ goethite} = m'(OH^-)_{PA\ adsorption} + m'(OH^-)_{consumed\ by\ P-OH\ of\ PA} \quad (9)$$

The  $m'(OH^-)_{consumed\ by\ P-OH\ of\ PA}$  can be calculated according to the mole adsorption of PA, the pH value, the  $pK_a$  value of P-OH, and the bidentate complexation from P-OH having  $pK_a(i)$  and  $pK_a(ii)$ :

$$m'(OH^-)_{consumed\ by\ P-OH\ of\ PA} = m'(P-OH(i))_{adsorbed} + m'(P-OH(ii))_{adsorbed} \quad (10)$$

where,  $m'(P - OH(i)_{adsorbed})$  and  $m'(P - OH(ii)_{adsorbed})$  are the mole P-OH engaged in ligand exchange with  $pK_a(i)$  and  $pK_a(ii)$ , respectively:

$$m'(P - OH(i)_{adsorbed}) = m'((PA)_{adsorbed}) \times \frac{10^{-pH}}{K_a(i) + 10^{-pH}} \quad (11)$$

$$m'(P - OH(ii)_{adsorbed}) = m'((PA)_{adsorbed}) \times \frac{10^{-pH}}{K_a(ii) + 10^{-pH}} \quad (12)$$

The  $S_{P-OH-OH^-}$  of PA was derived from the calculated  $m'(OH^-_{PA-motivated\ release\ from\ goethite})$  and  $m'(P - O(H)_{PA\ complexation})$ . The results were shown in Fig. 3b.

### **Text-S9. The logic behind using $S_{P-OH-OH^-}$ to compare the $pK_a$ values of adsorption sites of NNAs and PA**

$S_{P-OH-OH^-}$  represents the stoichiometric relationship between the  $OH^-$  released from goethite ( $Q_1$ ) and the P-O(H) groups (including P-OH and P-O<sup>-</sup>) engaged in Fe-O-P bonding. The value of  $S_{P-OH-OH^-}$  depends on the proportion of Fe-OH (relative to Fe-OH<sub>2</sub><sup>+</sup>) involved in Fe-O-P bonding (because the mole ratio of  $OH^-$  release to Fe-O-P bond formation is 1 for Fe-OH and 0 for Fe-OH<sub>2</sub><sup>+</sup>, while the  $S_{P-OH-OH^-}$  is a sum of them). This proportion is determined by the pH and the  $pK_a$  value of Fe-OH<sub>2</sub><sup>+</sup>. Therefore, at a given pH, the value of  $S_{P-OH-OH^-}$  depends on the  $pK_a$  value of Fe-OH<sub>2</sub><sup>+</sup>, suggesting that if two types of sites (Fe-OH<sub>2</sub><sup>+</sup>) have the same  $S_{P-OH-OH^-}$  value, their  $pK_a$  values would be the same.

The observation that NNA adsorption is blocked by PA (Fig 1d) indicates that the adsorption sites for NNAs are also the adsorption sites for PA. This suggests that the adsorption sites of PA consist of two parts: one part is available for both NNAs and PA adsorption, while the other part is not available for NNAs but only for PA adsorption. Consequently, two types of  $S_{P-OH-OH^-}$  values can be quantified for PA: one from PA adsorption without the coexistence of NNAs (where all adsorption sites are available for PA, case I), and the other from PA adsorption in the presence of NNAs (where some sites are occupied by NNAs and not available for PA adsorption, case II) (see the following scheme).

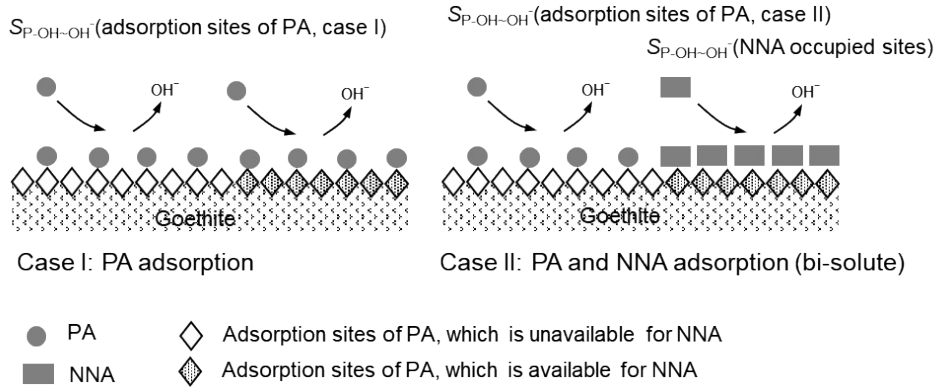

The  $S_{P-OH-OH^-}$  value from case I represents the stoichiometric relationship between the  $OH^-$  released from goethite ( $Q_1$ ) and the P-O(H) engaged in Fe-O-P bonding for all adsorption sites on goethite. This is contributed by the  $S_{P-OH-OH^-}$  value from PA adsorption sites and  $S_{P-OH-OH^-}$  value from the occupied adsorption sites by NNAs in case II:

$$S_{P-OH-OH^-}(\text{adsorption sites of PA, case I}) = f \cdot S_{P-OH-OH^-}(\text{adsorption sites of PA, case II}) + (1-f) \cdot S_{P-OH-OH^-}(\text{NNA occupied sites}) \quad (13)$$

where  $f$  is the fraction contributed by adsorption sites of PA not occupied by NNA.

If the  $pK_a$  values of the adsorption sites for NNAs are the same as (or comparable to) that of PA, the value of  $S_{P-OH-OH^-}$  for the NNA occupied sites (case II) would be the same as (or approximate to) the value of  $S_{P-OH-OH^-}$  for the adsorption sites of PA (case I). Thus, according to equation (13), the value of  $S_{P-OH-OH^-}$  for the adsorption sites of PA (case I) would also be the same as (or approximate to) the value of  $S_{P-OH-OH^-}$  for the adsorption sites of PA in the presence of NNAs (case II). This implies that partial occupation of adsorption sites of PA by NNAs would not change the value of  $S_{P-OH-OH^-}$  for PA, or it may be altered. In conclusion, the  $S_{P-OH-OH^-}$  value can be used to examine whether the  $pK_a$  values of adsorption sites are the same (or comparable) for NNAs and PA at the same pH. If the  $pK_a$  values of adsorption sites for NNAs are the same as (or comparable to) that of PA, partial occupation of the adsorption sites of PA by NNA would not change the value of  $S_{P-OH-OH^-}$  for PA; otherwise, it may be altered.

**Table-S1.** Molecular weight, sources, purity and Nanodrop detecting wavelength of chemicals

| Chemicals listed in Fig. 1 | Corresponding chemicals purchased               |                  |         |            |                                                 |                                        |
|----------------------------|-------------------------------------------------|------------------|---------|------------|-------------------------------------------------|----------------------------------------|
|                            | Name                                            | Molecular weight | Source  | Purity (%) | Nanodrop detecting wavelength <sup>a</sup> (nm) | Limit of detection <sup>b</sup> (mg/L) |
| ATP                        | Adenosine 5'-triphosphate disodium salt hydrate | 551.14           | Aladdin | 98         | 260                                             | 2.40                                   |
| ADP                        | Adenosine 5'-diphosphate disodium salt hydrate  | 471.16           | Aladdin | >98        | 260                                             | 2.05                                   |
| AMP                        | Adenosine 5'-monophosphate sodium salt          | 369.2            | Aladdin | 99         | 260                                             | 5.22                                   |
| CTP                        | Cytidine 5'-triphosphate disodium salt          | 527.12           | Aladdin | 95         | 272                                             | 4.14                                   |
| CDP                        | Cytidine 5'-diphosphate trisodium salt hydrate  | 469.12           | Aladdin | 95         | 272                                             | 3.37                                   |

|      |                                                                |        |               |      |     |      |
|------|----------------------------------------------------------------|--------|---------------|------|-----|------|
| CMP  | Cytidine 5'-monophosphate                                      | 323.2  | Macklin       | 99   | 271 | 2.23 |
| GMP  | Guanosine 5'-monophosphate disodium salt hydrate               | 407.18 | Aladdin       | 98   | 272 | 3.28 |
| dTMP | Thymidine 5'-monophosphate disodium salt hydrate               | 366.17 | Aladdin       | 99   | 265 | 2.78 |
| dUMP | 2'-Deoxyuridine 5'-monophosphate disodium salt                 | 352.15 | Yuanye        | 98   | 260 | 2.61 |
| PA   | Potassium phosphate monobasic                                  | 136.09 | Macklin       | 99.5 | -   | 0.01 |
| DNA1 | Deoxyribonucleic acid, low molecular weight from salmon sperm  | -      | Sigma-Aldrich | ≤5%  | 260 | 3.70 |
| DNA3 | Deoxyribonucleic acid sodium salt from herring testes Type XIV | -      | Sigma-Aldrich | -    | 260 | 2.65 |
| RNA  | Ribonucleic acid                                               | -      | Yuanye        | 90   | 260 | 2.43 |
| A    | Adenosine                                                      | 267.24 | Aladdin       | 99   | 260 | 1.09 |
| C    | Cytidine                                                       | 243.22 | Aladdin       | 99   | 272 | 1.62 |
| G    | Guanosine                                                      | 283.24 | Aladdin       | 98   | 250 | 1.46 |
| dT   | Deoxythymidine                                                 | 242.23 | Aladdin       | 99   | 267 | 2.22 |
| dU   | Doxyuridine                                                    | 228.2  | Aladdin       | 99   | 260 | 1.88 |

<sup>a</sup>The detecting wavelength of DNA2 is 260 nm. <sup>b</sup>The detection of limit is estimated using 5 mM KCl (pH is 7.00 ± 0.10) as control (the average absorbance is about 0.002), the concentration of PA is based on phosphorus atom (i.e., mg-P/L).

**Table-S2.** Content and volume of goethite suspension and chemical solution used in the adsorption experiment

| Category                           | Experiment for PA                                                                                                | Experiment for nucleotide                                                                                               | Experiment for nucleic acid                                                                                      | Experiment for other chemicals                                                                                        | Experiment for PA and nucleotide (or nucleic acid) coexisted | Corresponding figure |
|------------------------------------|------------------------------------------------------------------------------------------------------------------|-------------------------------------------------------------------------------------------------------------------------|------------------------------------------------------------------------------------------------------------------|-----------------------------------------------------------------------------------------------------------------------|--------------------------------------------------------------|----------------------|
| Monitoring pH change in adsorption | 1000 μL goethite suspension (solid content 27.3 mg/mL, pH 7.0) + 1000 μL PA solution (1.00 mmol/L P-O(H), pH7.0) | 1000 μL goethite suspension (solid content 27.3 mg/mL, pH 7.0) + 1000 μL chemical solution (1.00 mmol/L P-O(H), pH 7.0) | 1000 μL goethite suspension (solid content 27.3 mg/mL, pH 7.0) + 1000 μL 800 mg/L nucleic acid solution (pH 7.0) | 1000 μL goethite suspension (solid content 27.3 mg/mL, pH 7.0) + 1000 μL chemical (1.00 mmol/L for A, C, G, dT or dU) |                                                              | Figure 3b            |

|                                                                                                                           |                                                                                                                                                                                                                                                                |                                                                                                                                                                                                                                                                              |                                                                                                                                                                                                                                                                                |                                                                                                                                                                                                                                                  |                                                                                                                                                                                                                                                                                                                           |
|---------------------------------------------------------------------------------------------------------------------------|----------------------------------------------------------------------------------------------------------------------------------------------------------------------------------------------------------------------------------------------------------------|------------------------------------------------------------------------------------------------------------------------------------------------------------------------------------------------------------------------------------------------------------------------------|--------------------------------------------------------------------------------------------------------------------------------------------------------------------------------------------------------------------------------------------------------------------------------|--------------------------------------------------------------------------------------------------------------------------------------------------------------------------------------------------------------------------------------------------|---------------------------------------------------------------------------------------------------------------------------------------------------------------------------------------------------------------------------------------------------------------------------------------------------------------------------|
| Monitoring effect of coexistence of anions and pre-adsorption of PA on adsorption of nucleotide and nucleic acid at pH7.0 | 600 $\mu$ L goethite suspension (solid content 24.9 mg/mL, pH 7.0)<br>+<br>1000 $\mu$ L PA solution (1.00 mmol/L PA P-O(H), and 1.00 mmol/L Na <sub>2</sub> SO <sub>4</sub> or 2.00 mmol/L KCl, pH 7.0)<br>+<br>1000 $\mu$ L HCl (for keeping final pH of 7.0) | 600 $\mu$ L goethite suspension (solid content 24.9 mg/mL, pH 7.0)<br>+<br>1000 $\mu$ L chemical solution (1.00 mmol/L nucleotide P-O(H), and 1.00 mmol/L Na <sub>2</sub> SO <sub>4</sub> or 2.00 mmol/L KCl, pH 7.0)<br>+<br>1000 $\mu$ L HCl (for keeping final pH of 7.0) | 600 $\mu$ L goethite suspension (solid content 24.9 mg/mL, pH 7.0)<br>+<br>1000 $\mu$ L chemical solution (1.00 mmol/L nucleic acid P-O(H), and 2.00 mmol/L Na <sub>2</sub> SO <sub>4</sub> or 2.00 mmol/L KCl, pH 7.0)<br>+<br>1000 $\mu$ L HCl (for keeping final pH of 7.0) | 600 $\mu$ L goethite suspension (solid content 24.9 mg/mL, pH 7.0)<br>+<br>1000 $\mu$ L chemical solution (0.50 mmol/L A, C, G, dT or dU, pH 7.0)<br>+<br>1000 $\mu$ L 5mM KCl (pH of 7.0)                                                       | Figure 1c, d and e                                                                                                                                                                                                                                                                                                        |
|                                                                                                                           | Monitoring ligand exchange at pH7.0                                                                                                                                                                                                                            | 600 $\mu$ L goethite suspension (solid content 27.2 mg/mL, 24.9 mg/mL, 21.4 mg/mL, pH 7.0)<br>+<br>1000 $\mu$ L PA solution (0~2.00 mmol-P/L, pH7.0)<br>+<br>0~1000 $\mu$ L (1.86mmol/L HCl)<br>+<br>5 mmol/L KCl (pH7.00) to reach a final volume of 2.60 mL                | 600 $\mu$ L goethite suspension (solid content 27.2 mg/mL, pH 7.0)<br>+<br>1000 $\mu$ L nucleotide solution (0~2.20 mmol-P/L, pH 7.0)<br>+<br>0~1000 $\mu$ L (1.86mmol/L HCl)<br>+<br>5 mmol/L KCl (pH7.00) to reach a final volume of 2.60 mL                                 | 600 $\mu$ L goethite suspension (solid content 27.2 mg/mL, pH 7.0)<br>+<br>1000 $\mu$ L nucleic acid solution (0~1.00 mmol-P/L, pH 7.0)<br>+<br>0~1000 $\mu$ L (1.86mmol/L HCl)<br>+<br>5 mmol/L KCl (pH7.00) to reach a final volume of 2.60 mL | 600 $\mu$ L goethite suspension (solid content 21.4 mg/mL, pH7.0)<br>+<br>1000 $\mu$ L PA and nucleotide (or nucleic acid) coexisted solution (nucleotide (or nucleic acid) P-O(H):PA P-O(H)=1:1;1:2;1:3, pH7.0)<br>+<br>0~1000 $\mu$ L (1.86mmol/L HCl)<br>+<br>5 mmol/L KCl (pH7.00) to reach a final volume of 2.60 mL |

**Table-S2 (Continue)**

|                                                                                               |                                                                                                                                                 |                                                                                                                                                       |                                                                                                                                                          |                       |
|-----------------------------------------------------------------------------------------------|-------------------------------------------------------------------------------------------------------------------------------------------------|-------------------------------------------------------------------------------------------------------------------------------------------------------|----------------------------------------------------------------------------------------------------------------------------------------------------------|-----------------------|
| Adsorption isotherm at pH7.0                                                                  | 900 $\mu$ L goethite suspension (solid content 27.2 mg/mL, pH 7.0)<br>+<br>3000 $\mu$ L PA solution (0~200 mg/L, containing HCl for pH control) | 900 $\mu$ L goethite suspension (solid content 27.2mg/mL, pH7.0)<br>+<br>3000 $\mu$ L nucleotide solution (0~200 mg/L, containing HCl for pH control) | 600 $\mu$ L goethite suspension (solid content 27.2 mg/mL, pH7.0)<br>+<br>2000 $\mu$ L nucleic acid solution (0~200 mg/L, containing HCl for pH control) | Figure 1b and Fig. S9 |
| <sup>a</sup> The content and volume of A, C, G, dT and dU are the same as that of nucleotide. |                                                                                                                                                 |                                                                                                                                                       |                                                                                                                                                          |                       |

**Table-S3.** Relation of P-O(H) engaged in Fe-O-P bonding with molecular structure and phosphorus adsorption capacity\*

| Name | Molecular weight (g/mol) | Molecular P-OH number | PO(H) number engaged in Fe-O-P bonding in NNA molecule | Percent of P-O(H) engaged in Fe-O-P bonding (%) | NNA mass adsorbed / PO(H) number engaged in Fe-O-P bonding (g/mol) | $Q_e$ at final phosphorus concentration of 50 $\mu\text{mol-P/L}$ ( $\mu\text{mol/g}$ ) |
|------|--------------------------|-----------------------|--------------------------------------------------------|-------------------------------------------------|--------------------------------------------------------------------|-----------------------------------------------------------------------------------------|
| dUMP | 308.15                   | 2                     | 2                                                      | 100                                             | 154                                                                | 0.20                                                                                    |
| dTMP | 322.17                   | 2                     | 2                                                      | 100                                             | 161                                                                | 0.33                                                                                    |
| CMP  | 323.2                    | 2                     | 2                                                      | 100                                             | 162                                                                | 0.47                                                                                    |
| AMP  | 347.2                    | 2                     | 2                                                      | 100                                             | 174                                                                | 0.76                                                                                    |
| GMP  | 363.18                   | 2                     | 2                                                      | 100                                             | 182                                                                | 0.73                                                                                    |
| CDP  | 403.12                   | 3                     | 3                                                      | 100                                             | 134                                                                | 1.14                                                                                    |
| ADP  | 427.16                   | 3                     | 3                                                      | 100                                             | 142                                                                | 0.90                                                                                    |
| CTP  | 483.12                   | 4                     | 3 or 4                                                 | 75-100                                          | 121-161                                                            | 1.04                                                                                    |

|      |               |             |            |        |         |      |
|------|---------------|-------------|------------|--------|---------|------|
| ATP  | 507.14        | 4           | 3 or 4     | 75-100 | 127-169 | 1.15 |
| RNA  | 8458±4236     | 61±23       | 37±14      | 60.57  | 633     | 1.50 |
| DNA1 | 14966±11633   | 103±73      | 70±50      | 68.01  | 469     | 1.29 |
| DNA2 | 131962±67524  | 950±370     | 493±192    | 51.90  | 846     | 1.37 |
| DNA3 | 590716±497392 | 40200±31800 | 11420±9034 | 28.41  | 1703    | 1.23 |

\* $Q_e$  is the amount adsorbed.



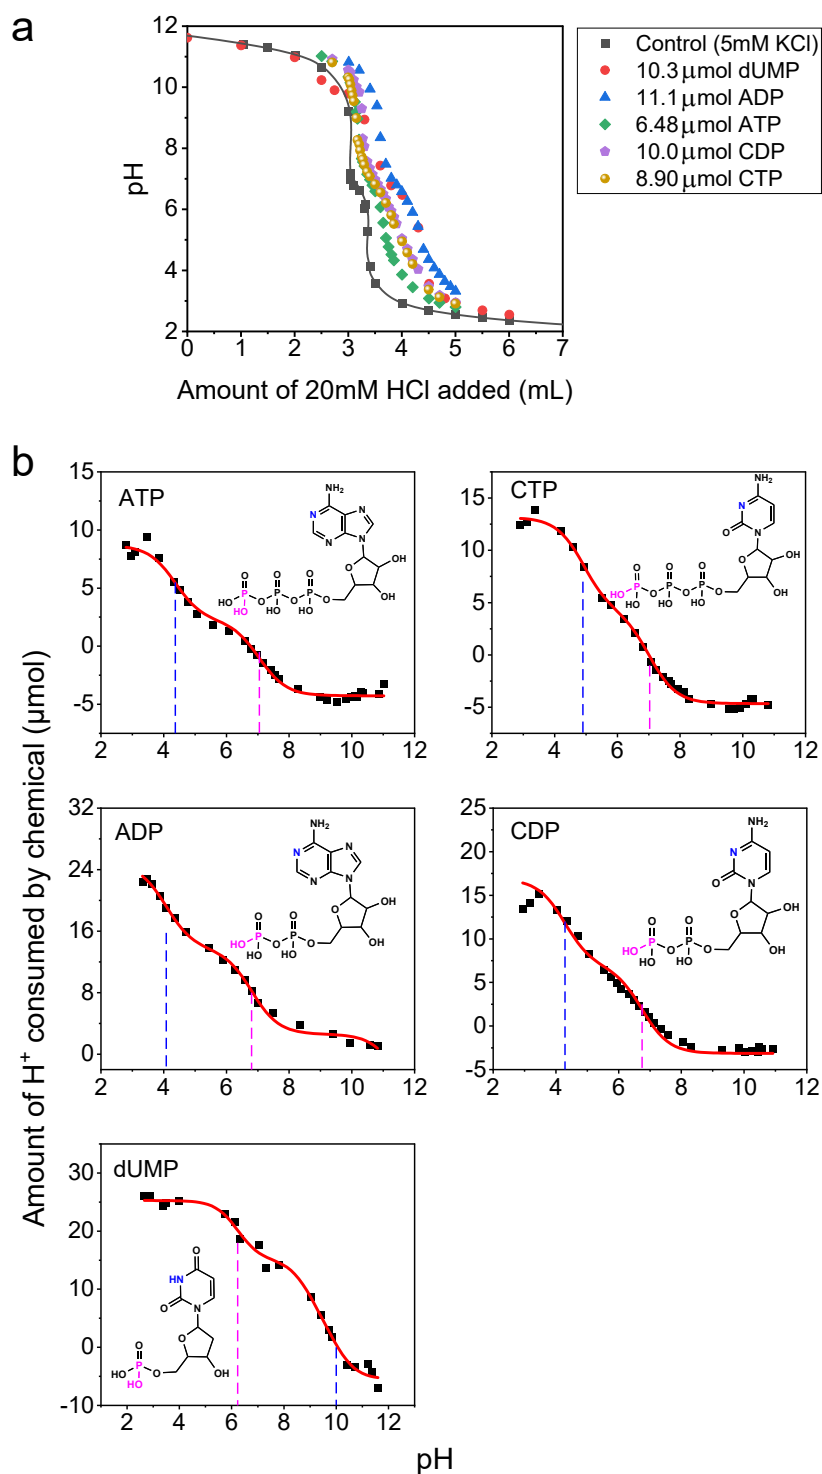

**Fig. S1.** Acid-base titration results (a) and pH-dependent proton consumption of chemicals (b). The proton consumption curves are derived from regression analysis using the equation listed in Text-S1. The dashed line colored in pink indicates the pH equaling to the pK<sub>a</sub> of nucleotide P-OH. The dashed line colored in blue indicates the pH equal to the pK<sub>a</sub> of nucleotide -NH<sup>+</sup>-(OR -NH<sub>2</sub><sup>+</sup>). Since the P-OH groups in the chemicals are used partially or exist as salts (see Table S1), the pH corresponding to the net consumption of H<sup>+</sup> varied for different chemicals.

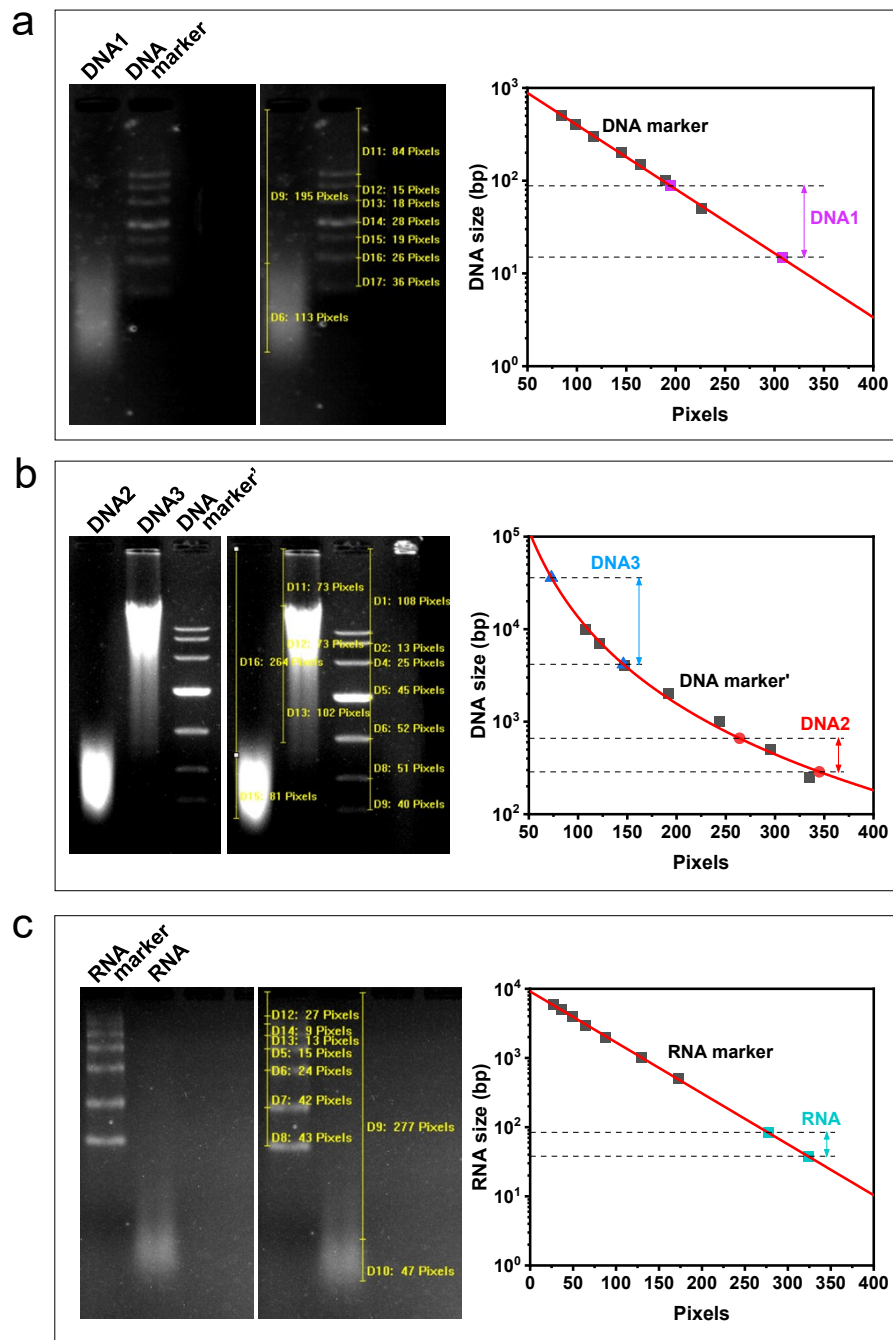

**Fig. S2.** Gel electrophoresis and estimated sizes of nucleic acids. The running distance of nucleic acids (reflected by software Image-Pro Plus 6.0) and size of nucleic acid (reflected by base pairs, i.e., bp) match exponential relation (i.e., the red curves, regression analysis  $R^2=0.991-0.999$ ). Based on the exponential relation, the sizes of nucleic acids were estimated.

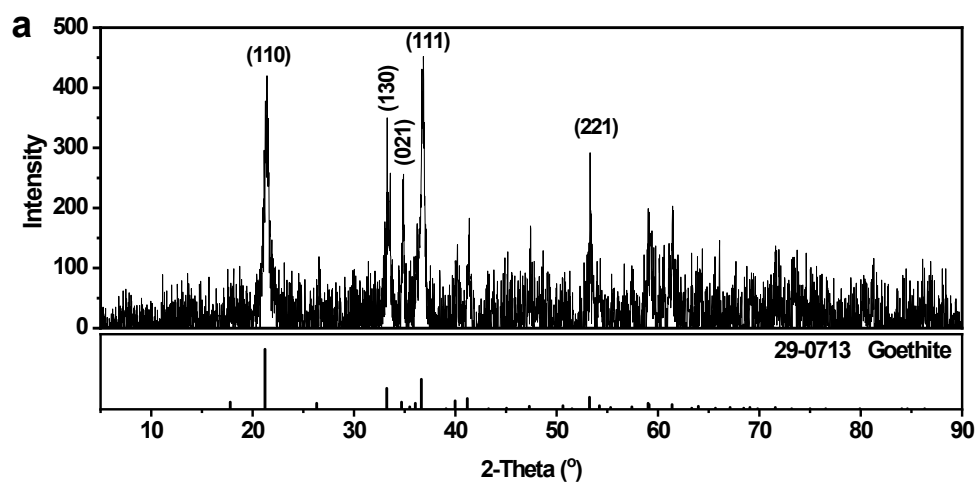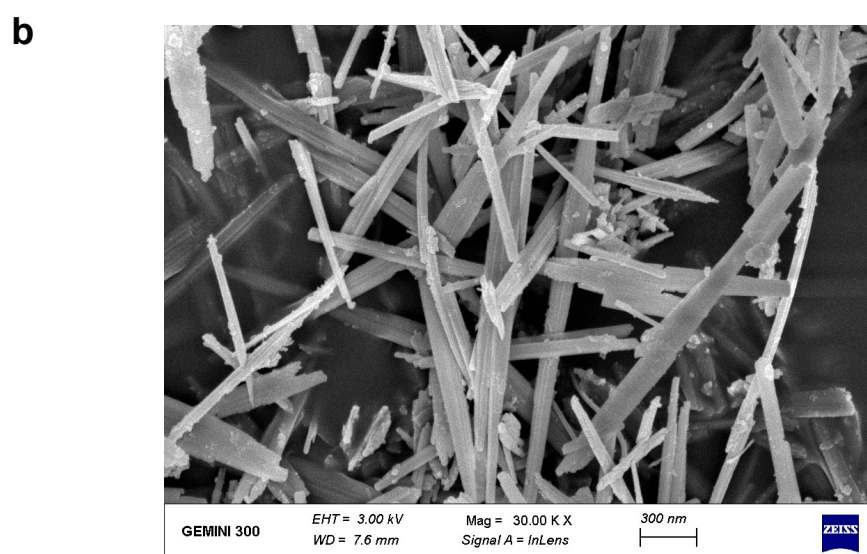

**Fig. S3.** Characterization of goethite. (a) XRD and (b) SEM

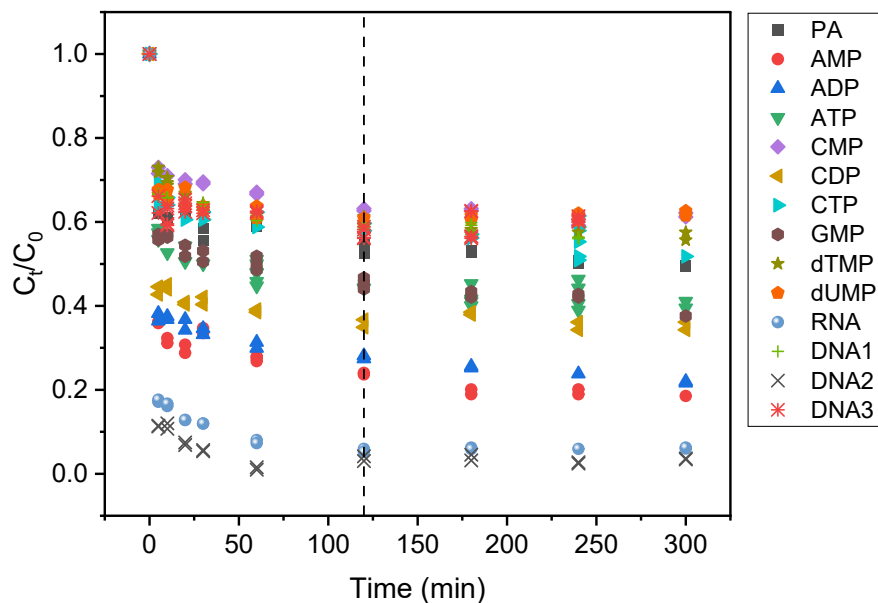

**Fig. S4.** Adsorption kinetics on goethite. The initial reaction pH is pH7.0, and the initial concentration of PA, nucleotide, and nucleic acid is  $100 \pm 5$  mg/L. The amount of goethite added was 6.23mg/mL for AMP, CMP, GMP, dTMP, ADP, CDP, ATP and CTP, 8.32mg/mL for dUMP, 6.01mg/mL for RNA and DNA2, and 4.50mg/mL for DNA1 and DNA3.  $C_0$ : Concentration in solution without adsorption.  $C_t$ : Concentration in solution at reaction time  $t$ .

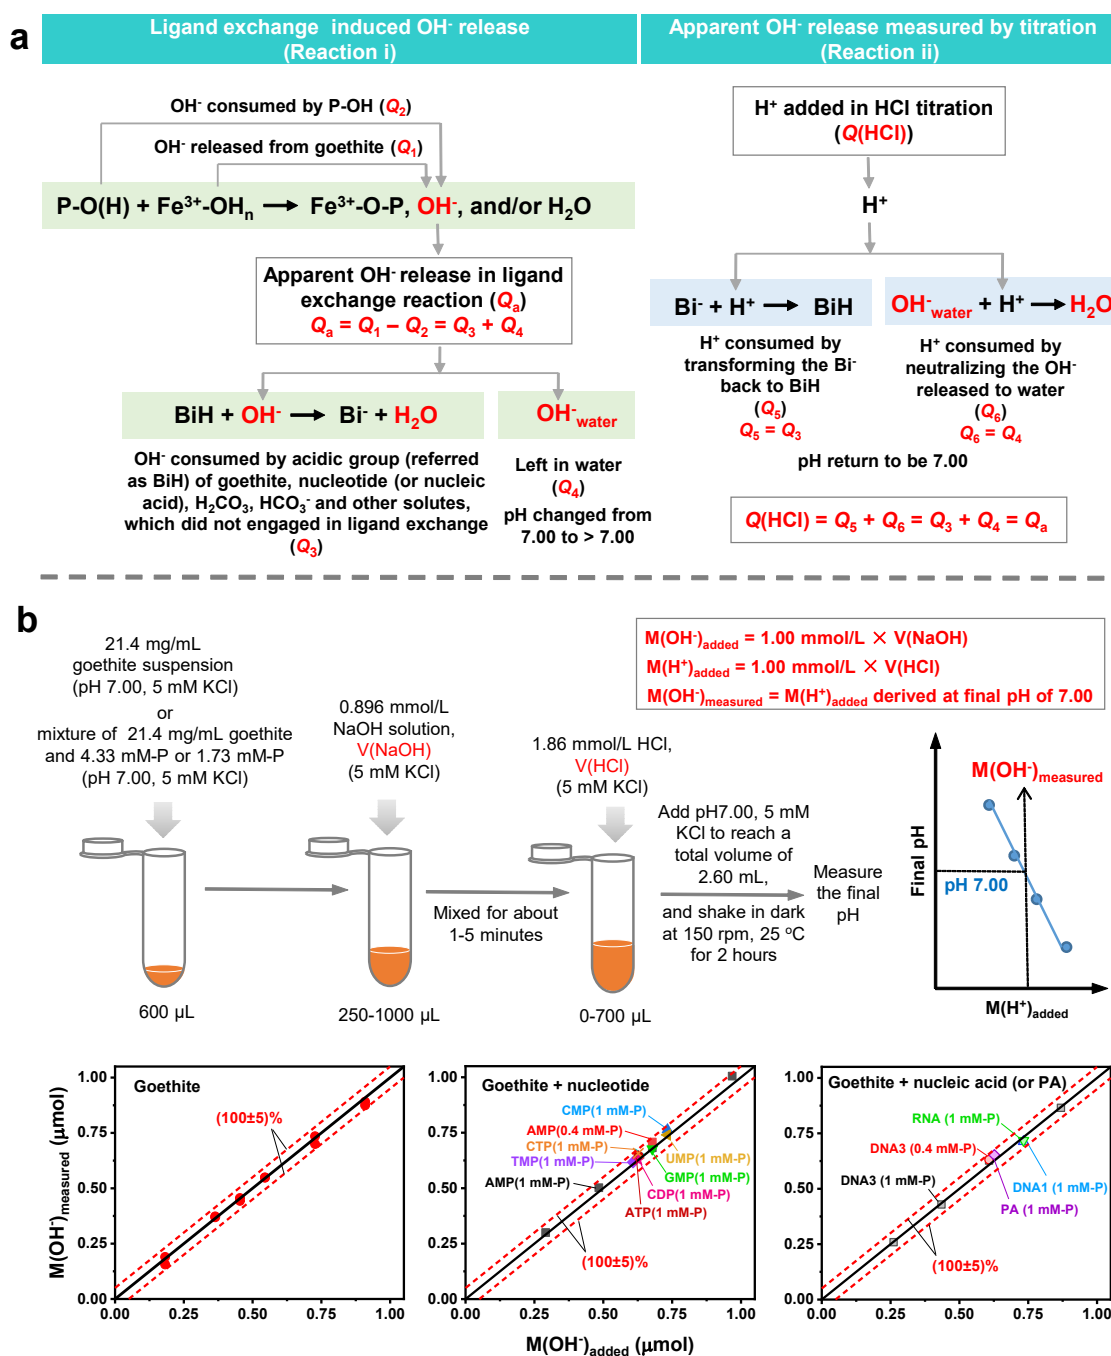

**Fig. S5.** Apparent OH<sup>-</sup> release in the forming of Fe-O-P bonds and theoretical aspects explaining why HCl titration could measure the apparent OH<sup>-</sup> release (a). Procedure and results in examination of the accuracy of the HCl titration method by comparing the added amount of NaOH and measured amount of OH<sup>-</sup> (b). The amount of goethite added is the same as that in monitoring Fe-O-P bonding at pH7.0 (see Table-S2). The concentration of nucleotide (or nucleic acid, PA, shown as the content of phosphorus) in the reaction systems after considering the dilution effect from addition of NaOH, HCl and KCl solution (i.e., 1 mM-P) approaches the maximum amount of nucleotide (or nucleic acid) added in experiments monitoring pH change or OH<sup>-</sup> release listed in Table-S2 (excepting adsorption isotherm experiment). The mole amount of NaOH added for checking HCl titration (0.182-0.968) was overlapped or close to the measured mole amount of apparent OH<sup>-</sup> release for nucleotide or nucleic acid (0.051-0.921  $\mu\text{mol}$ ).

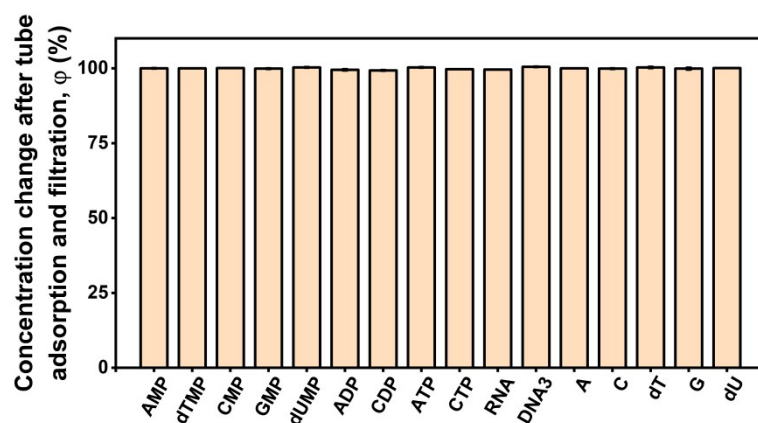

**Fig. S6.** Concentration change of nucleotide, nucleic acids and nucleoside in solution after tube adsorption and filtration. The procedure of experiment is detailed in Text-S7.

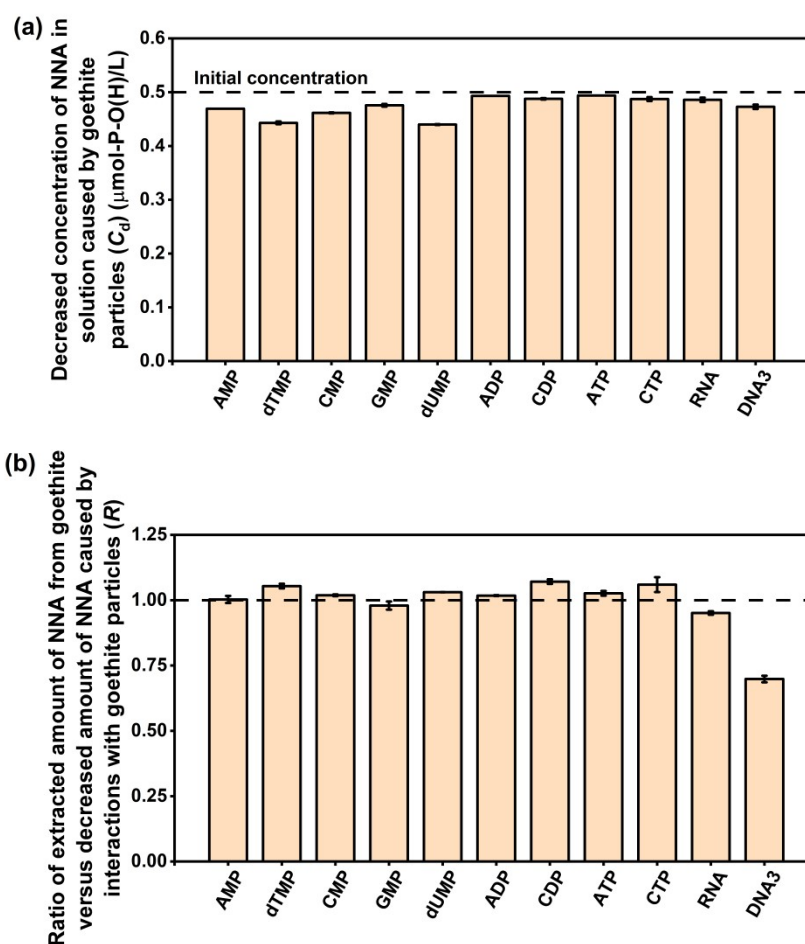

**Fig. S7.** Decreased concentration of NNA in solution caused by interactions with goethite particles (a) and the ratio of extracted amount of NNA from goethite versus the decreased amount of NNA caused by interactions with goethite (b). The procedure of experiment is detailed in Text-S7.

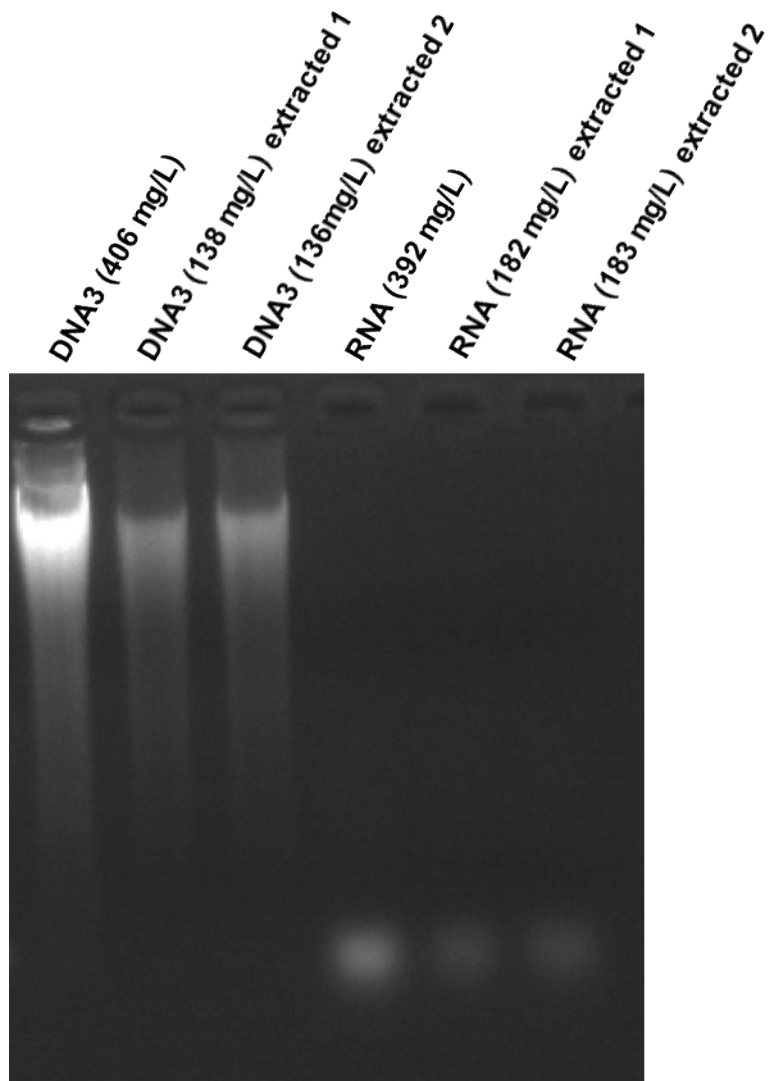

**Fig. S8.** Gel electrophoresis of RNA and DNA3 extracted from goethite. The extracted 1 and extracted 2 are the results of two repeats. The procedure of experiment is detailed in Text-S7.

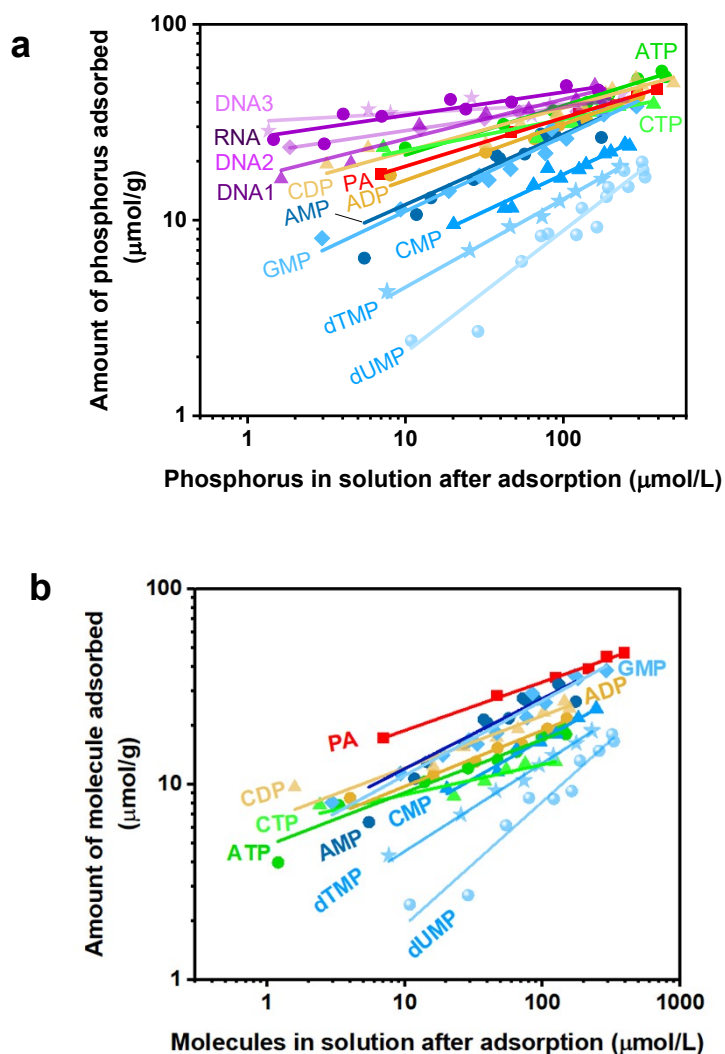

**Fig. S9.** Adsorption isotherm of PA and NNAs on goethite at pH7.0. (a) Adsorption isotherm derived based on the phosphorus. (b) Adsorption isotherm derived based on phosphate molecule (Since the nucleic acids used are a mixture of molecules of different sizes, the adsorption isotherm of nucleic acids are not derived)

**Fig. S10.** Solution pH, amount of phosphorus adsorbed and amount of HCl added for PA adsorption on goethite at pH7.0. (a) Amount of phosphorus adsorbed. (b) Amount of HCl (1.86 mmol/L) added. The red solid line is pH 7.0, while the dashed lines are from linear regression analysis of data. PA1, PA2, and PA3 represent the results of three replicates of PA adsorption on goethite. “μM” is μmol/L.



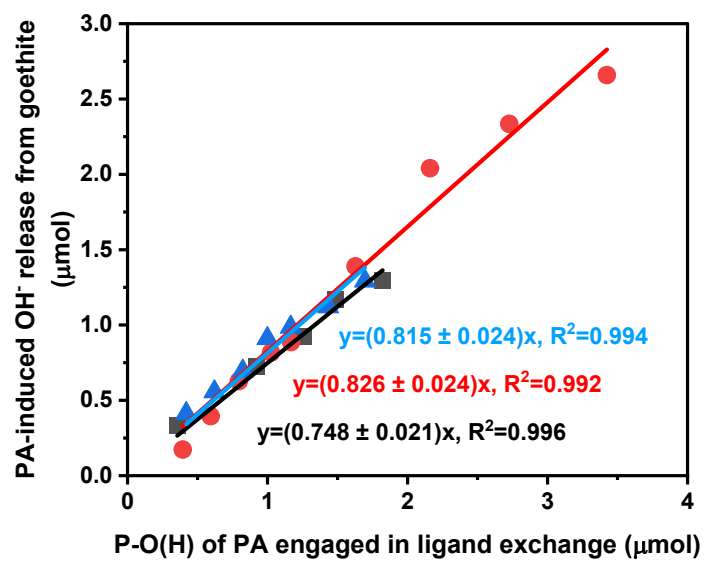

**Fig. S11.** The linear relationship between the amount of OH<sup>-</sup> released from goethite and the amount of PA P-O(H) engaged in Fe-O-P bonding for PA at pH of 7.0. Data points of rectangle, circle, and triangle are the results of three replicates.



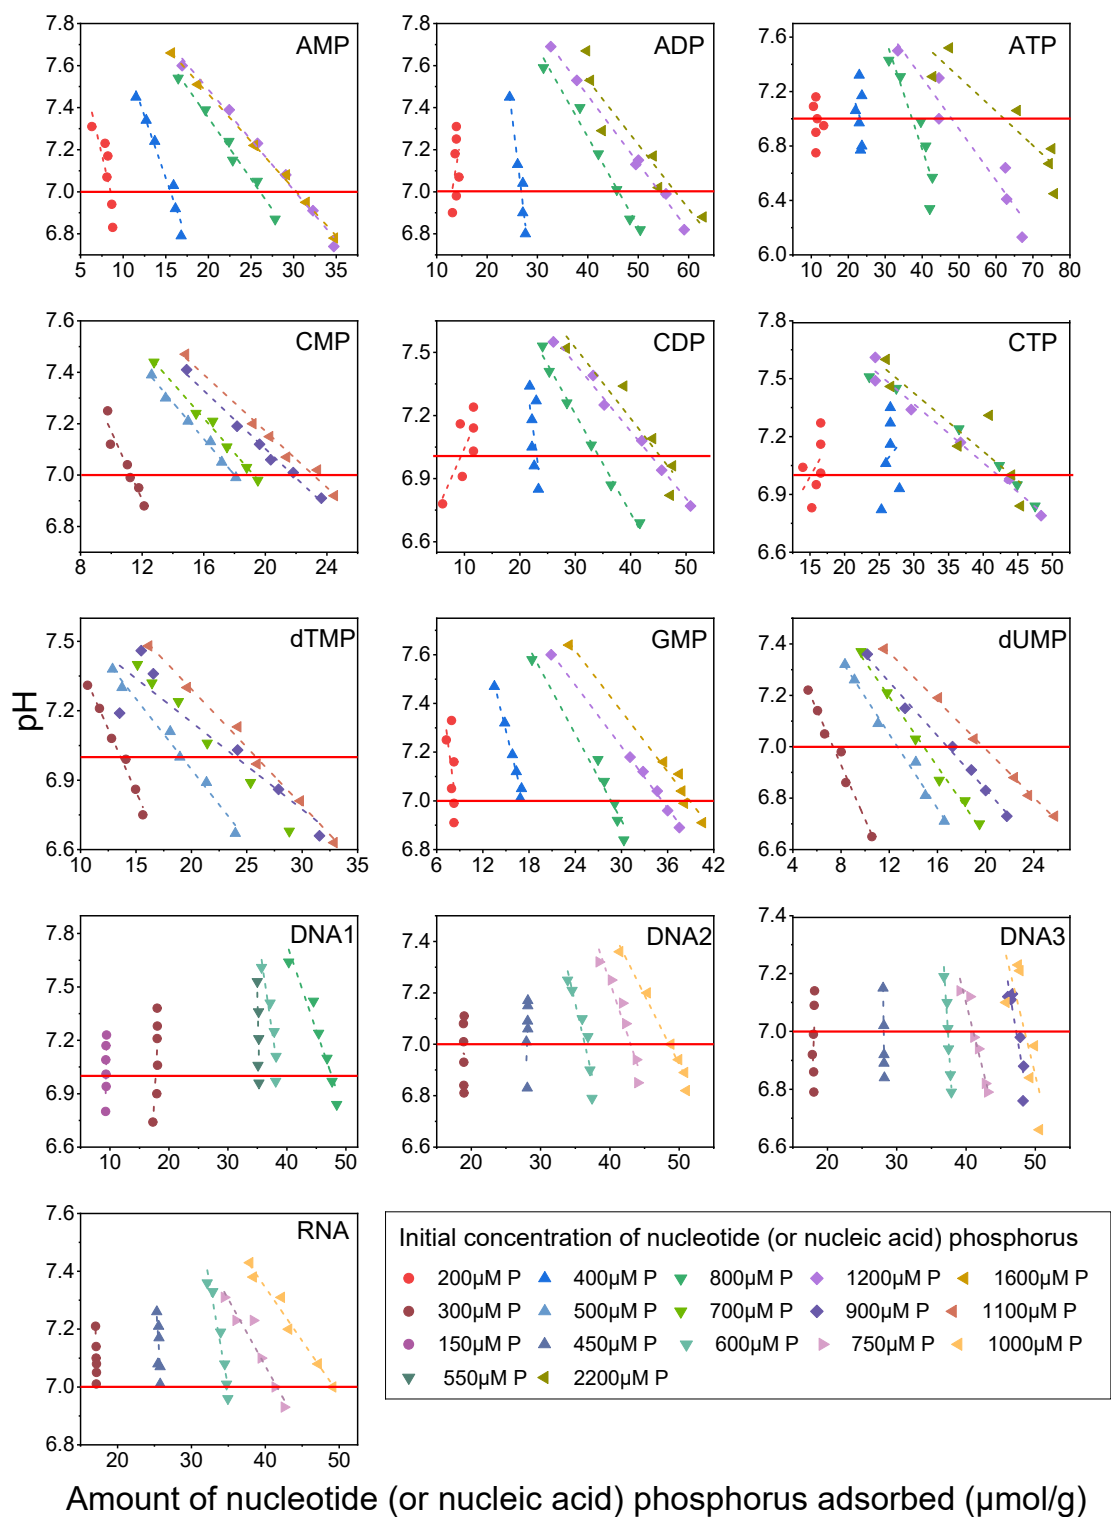

**Fig. S12.** Solution pH and amount of nucleotide (or nucleic acid) phosphorus adsorbed in the adsorption experiment when only nucleotide (nucleic acid) existed. The red solid line is pH 7.0, while the dashed lines are from linear regression analysis of data.

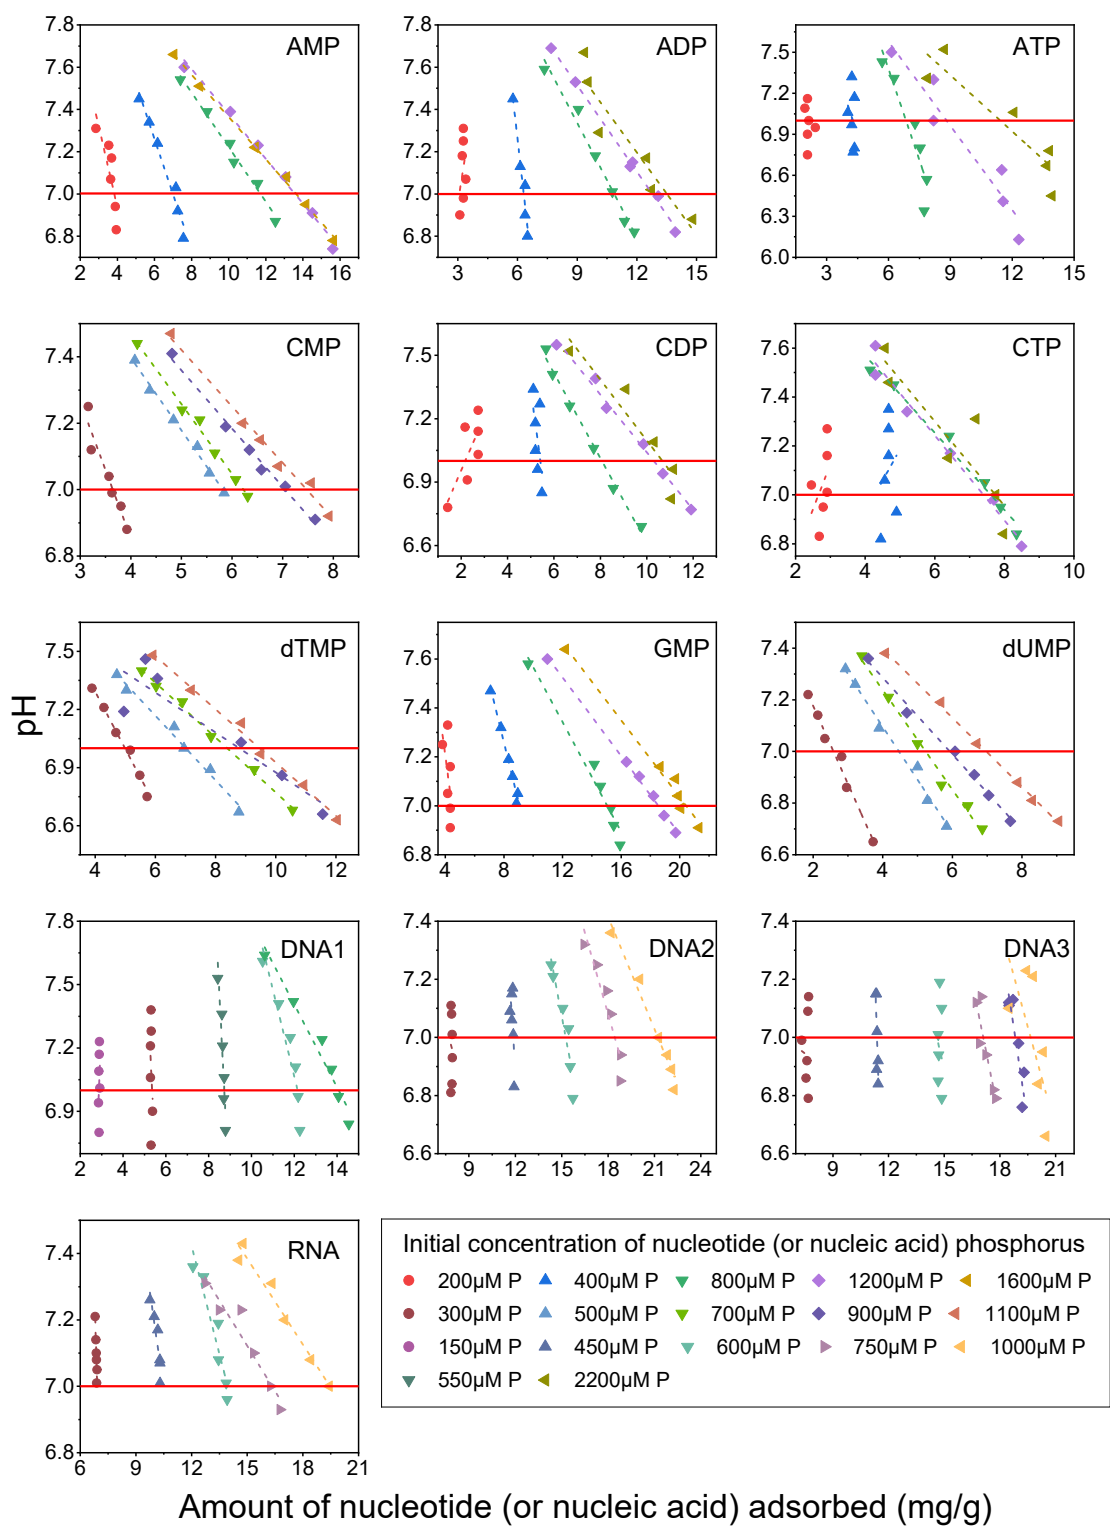

**Fig. S13.** Solution pH and amount of nucleotide (nucleic acid) adsorbed in the adsorption experiment when only nucleotide (nucleic acid) existed. The red solid line is pH 7.0, while the dashed lines are from linear regression analysis of data.

**Fig. S14.** Solution pH and amount of HCl added in the adsorption experiments when only nucleotide (or nucleic acid) existed. The red solid line is pH 7.0, while the dashed lines are from linear regression analysis of data.

**Fig. S15.** The linear relationship between the amount of nucleotide (or nucleic acid) adsorbed and the amount of apparent OH<sup>-</sup> release (determined by HCl titration) in the adsorption experiment when only nucleotide (nucleic acid) existed at pH of 7.0.

**Fig. S16.** Solution pH and amount of 2mM HCl added in the adsorption experiment when PA and nucleotide (or nucleic acid) coexisted. The red solid line is pH 7.0, while the dashed lines are from linear regression analysis of data.

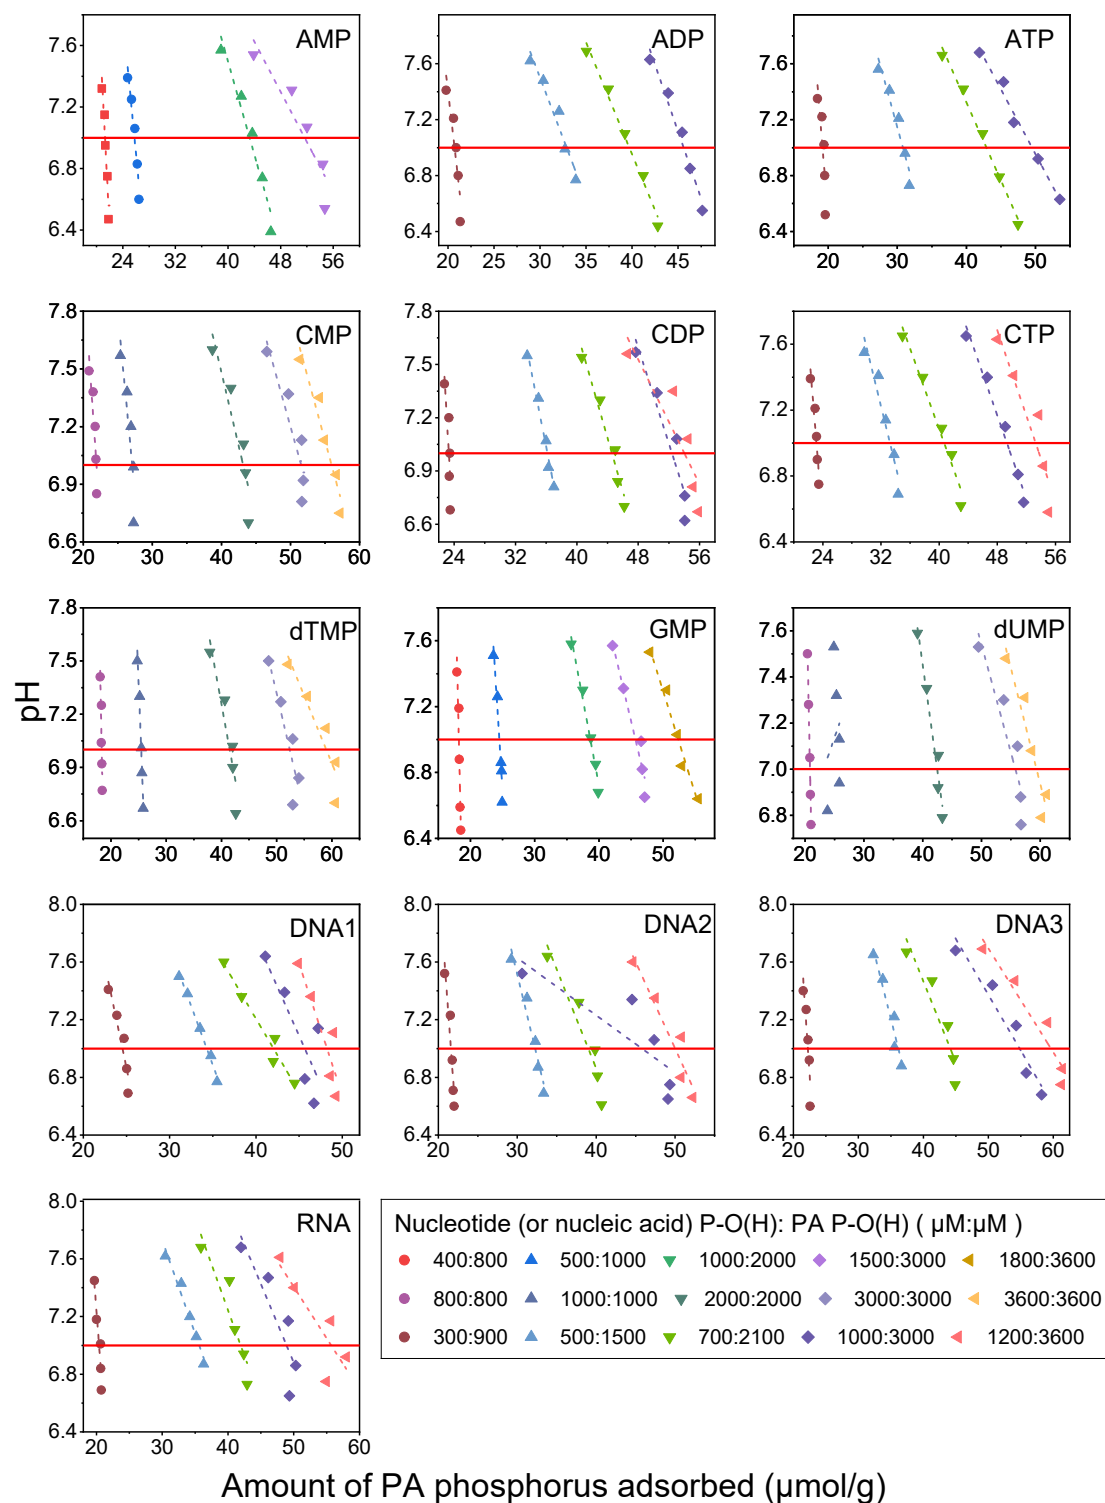

**Fig. S17.** Solution pH and amount of PA phosphorus adsorbed in adsorption experiment when PA and nucleotide (or nucleic acid) coexisted. The red solid line is pH 7.0, while the dashed lines are from linear regression analysis of data.

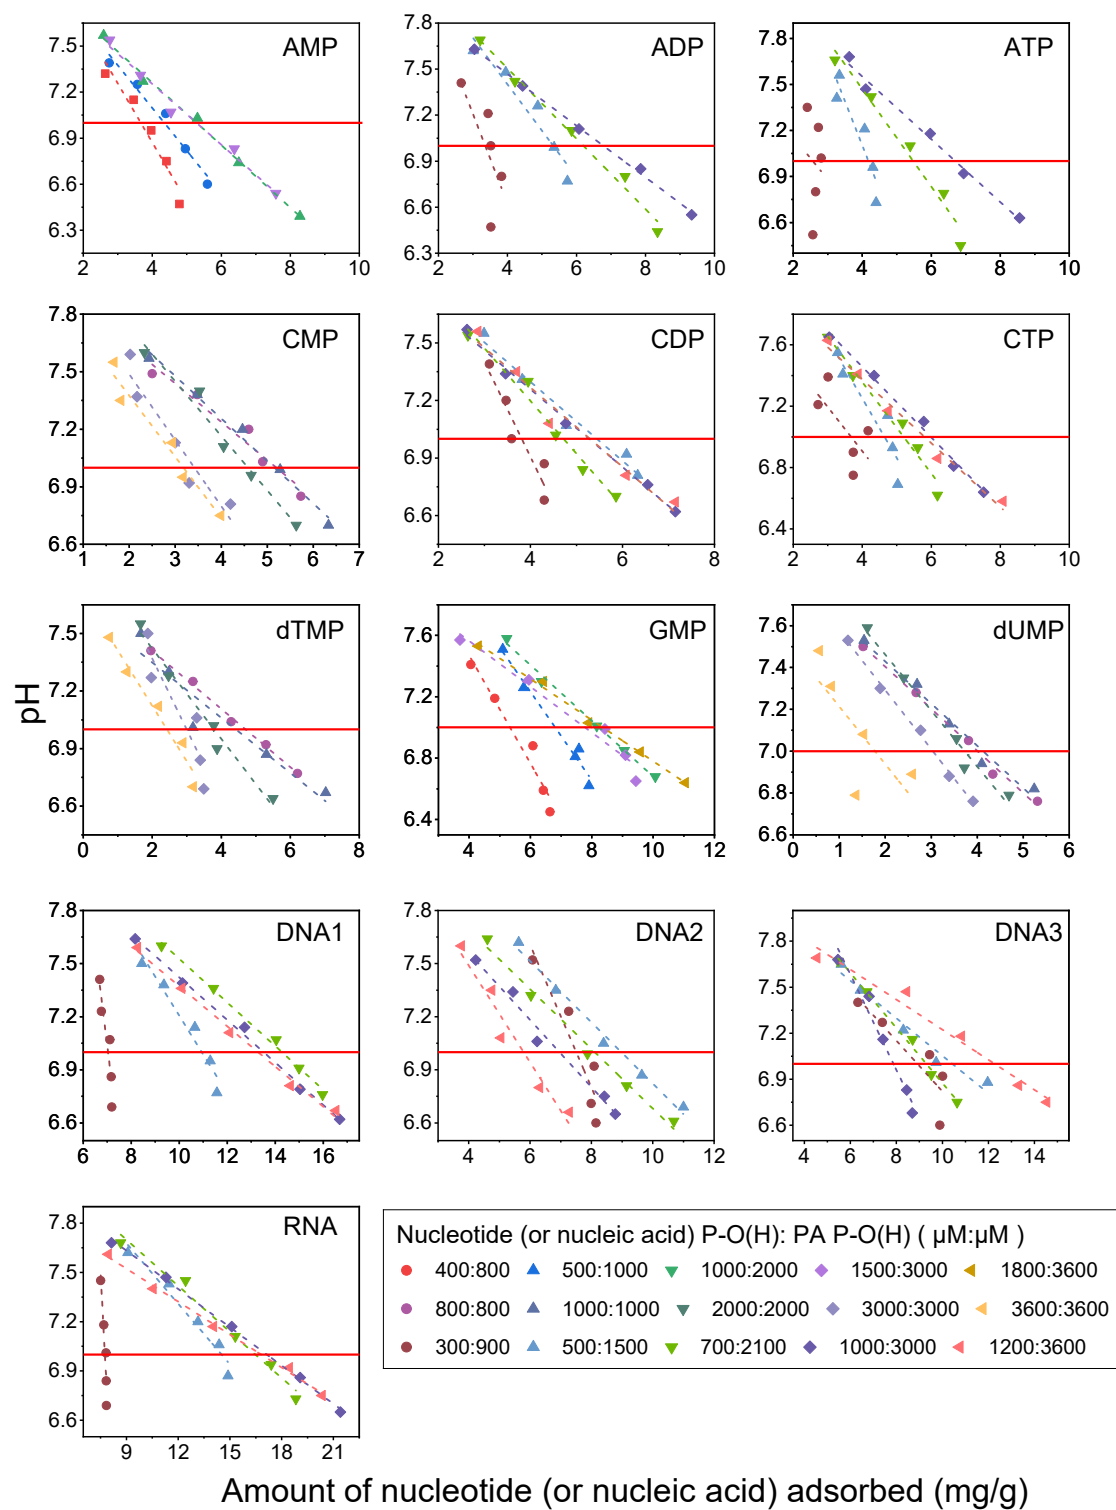

**Fig. S18.** Solution pH and amount of nucleotide (or nucleic acid) adsorbed in the adsorption experiment when PA and nucleotide (or nucleic acid) coexisted. The red solid line is pH 7.0, while the dashed lines are from linear regression analysis of data.

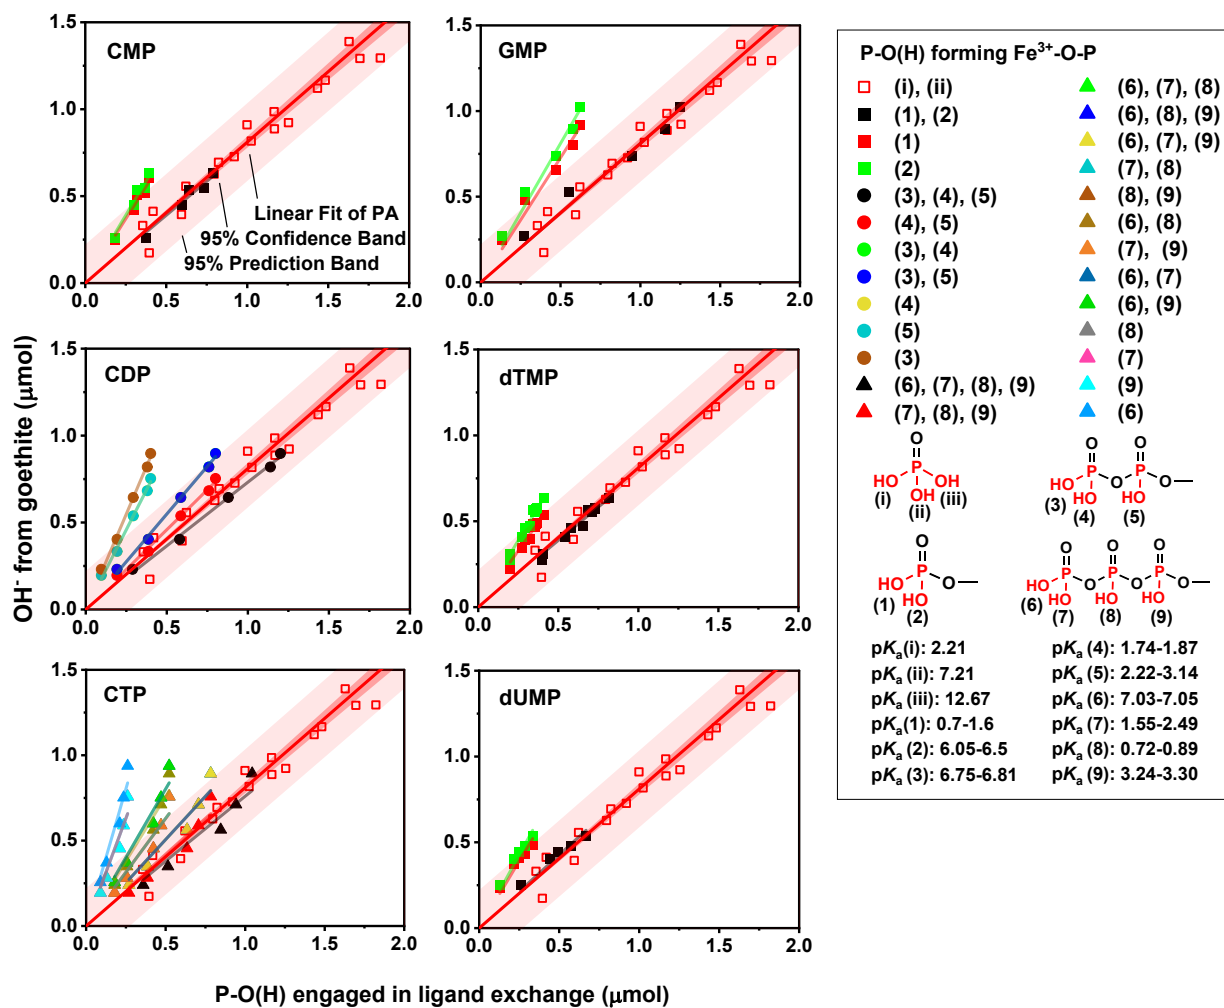

**Fig. S19.**  $S_{P-OH-OH^-}$  derived with assumed engagement of P-O(H) groups in Fe-O-P bonding for CMP, CDP, CTP, GMP, dTMP, dUMP and PA.



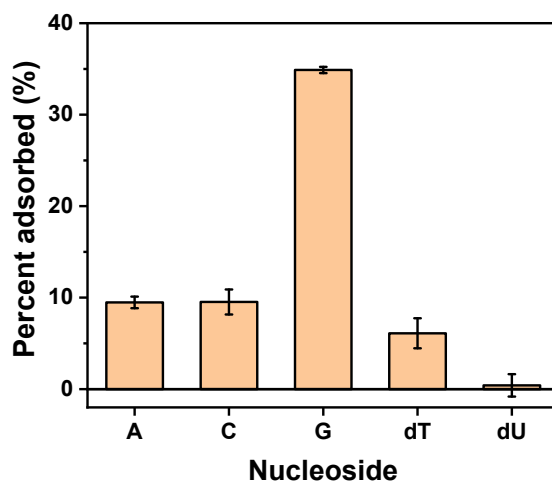

**Fig. S20.** Adsorption of nucleoside on goethite at pH7.0. The adsorption experiment is conducted by mixing 200  $\mu\text{L}$  goethite suspension (containing 112 mg goethite) with 1000  $\mu\text{L}$  nucleoside solution (concentration is 100 mg/L).

Among nucleotide monophosphate AMP, CMP, GMP, dTMP, and dUMP, the amount of P-O(H) groups engaged in Fe-O-P bonding relative to adsorbed phosphate molecule and relative to adsorbed phosphorus atom were unchanged. The affinity of nucleoside to goethite and the influence of nucleoside structure on the  $pK_a$  value of P-OH, instead of molecular P-O(H) groups content and molecular size, played an important role in causing the variation of phosphorus adsorption among nucleotide monophosphate. The adsorption capacity of nucleoside on goethite surface decreased as  $dU < dT < C \approx A < G$  (Fig. S20), matching the decreased adsorption capacity of nucleotide,  $dUMP < dTMP < CMP < AMP \approx GMP$ . The influence of nucleoside A on the  $pK_a$  value of P-OH in AMP may further enhance phosphorus adsorption to make AMP comparable to GMP. The smaller  $pK_a$  value (6.05) of P-OH in AMP than the  $pK_a$  value (6.3) of P-OH in CMP and GMP, made the proportion of P-OH in P-O(H) of AMP (including P-OH and  $\text{P-O}^-$ ) less than that in CMP and GMP (16.6%); In adsorption at pH7.0, less proportion of P-OH favored adsorption because P-OH experienced a free energy-unfavored deprotonation process (to be transformed to  $\text{P-O}^-$ ) in Fe-O-P bonding.

The different adsorption capacity of nucleosides on goethite may be related with the functional groups of these nucleosides. In adsorption on carbon nanostructure adsorbent (e.g., carbon nanotubes), the nucleobases are physisorbed in the order  $G > T \approx A > C > U$ , exhibiting  $\pi$ - $\pi$ -stacking type of interactions from the aromatic structures.<sup>6</sup> The sequence of adsorption capacity on goethite (e.g.,  $dU < dT < C \approx A < G$ ) is different from the nucleobases adsorption on carbon nanostructure. Since there is no aromatic structure on goethite, interactions from function groups like  $-\text{N}=\text{}$ ,  $-\text{NH}_2$ ,  $\text{C}=\text{O}$  and  $\text{C-OH}$  with goethite may play an important role.

## References

- 1 J.C. Kotz, P.M. Treichel, J. Townsend, D. Treichel, Chemistry & chemical reactivity, Cengage Learning, 2014, A-21.
- 2 Z.A. Shabarova, A.A. Bogdanov, Advanced organic chemistry of nucleic acids, John Wiley & Sons, 1994, 93-180.
- 3 Z. Chen, X. Xiao, B. Chen, L. Zhu, Quantification of chemical states, dissociation constants, and contents of oxygen-containing groups on the surface of biochars produced at different temperatures, *Environ. Sci. Technol.* 2015, 49, 1309-1317.
- 4 U. Schwertmann, R.M. Cornell, Iron oxides in the laboratory: preparation and characterization, John Wiley & Sons, 2008, 73-74.
- 5 J. Kim, W. Li, B.L. Philips, C.P. Grey, Phosphate adsorption on the iron oxyhydroxides goethite ( $\alpha$ -FeOOH), akaganeite ( $\beta$ -FeOOH), and lepidocrocite ( $\gamma$ -FeOOH): a  $^{31}\text{P}$  NMR study, *Energy Environ. Sci.* 2011, 4, 4298.
6. D. Umadevi, S. Panigrahi, G.N. Sastry, Noncovalent interaction of carbon nanostructures, *Acc. Chem. Res.* 2014, 47, 8, 2574-2581.
